# Supplementary material for: Global ubiquitination analysis reveals extensive modification and proteasomal degradation of cowpox virus proteins, but preservation of viral cores
Source: PubMed Central journal article supplement (PMC5788924; doi:10.1038/s41598-018-20130-9), 2018-01-29
Supplement: 41598_2018_20130_MOESM1_ESM.pdf [file 41598_2018_20130_MOESM1_ESM.pdf]

# Supplementary Information

## Global ubiquitination analysis reveals extensive modification and proteasomal degradation of cowpox virus proteins, but preservation of viral cores

Marica Grossegese<sup>1</sup>, Joerg Doellinger<sup>1,2,\*</sup>, Annemarie Fritsch<sup>1</sup>, Michael Laue<sup>3</sup>, Janett Piesker<sup>3</sup>, Lars Schaade<sup>4</sup>, Andreas Nitsche<sup>1</sup>

Robert Koch Institute

<sup>1</sup>Centre for Biological Threats and Special Pathogens: Highly Pathogenic Viruses (ZBS 1), Berlin, 13353, Germany

<sup>2</sup>Centre for Biological Threats and Special Pathogens: Proteomics and Spectroscopy (ZBS 6), Berlin, 13353, Germany

<sup>3</sup>Centre for Biological Threats and Special Pathogens: Advanced Light and Electron Microscopy (ZBS 4), Berlin, 13353, Germany

<sup>4</sup>Centre for Biological Threats and Special Pathogens, Berlin, 13353, Germany

**\*Correspondence** should be sent to Joerg Doellinger, Robert Koch Institute, Centre for Biological Threats and Special Pathogens: Proteomics and Spectroscopy (ZBS 6), Seestr. 10, 13353 Berlin, Germany

doellingerj@rki.de; Phone +49 (0)30 18754 2373

Content:

### A) Supplementary Discussion

1. CPXV proteins with conserved ubiquitination sites (except core proteins)
2. Viral proteins degraded by the proteasome

### B) Supplementary Tables

Table S1: LC-MS/MS analysis of CPXV mature virion ubiquitinome: data overview.

Table S2: Origin of diGly(K) peptides.

Table S3: Quantification of lysine linkages using peptide areas.

Table S4: Identified ubiquitination sites in five CPXV strains.

Table S5: The conserved CPXV IMV ubiquitinome.

Table S6: Ubiquitinated CPXV mature virion proteins without conserved sites.

Table S7: CPXV proteins regulated by the proteasome.

Table S8: Host proteins degraded by the proteasome.

## A) Supplementary discussion

### 1. CPXV proteins with conserved ubiquitination sites (except core proteins)

**Host–virus interaction.** Of the eleven ubiquitinated proteins assigned to the term host–virus interaction, six proteins are associated with viral immune evasion, including inhibitor of antigen presentation A36, complement control protein C17, IL-18-binding protein C8, inhibitor of TNF-R and TLR signaling Q1 (VACV N1) and two host range factors F3 (VACV E3) and M1 (VACV K1). Of those proteins, VACV E3 is known to be ubiquitinated but distinct lysine residues have not been identified yet<sup>1</sup>. Also, VACV N1 has been shown to be ubiquitinated at all six possible lysine residues<sup>2</sup>. In our study we were able to identify two conserved ubiquitination sites in the CPXV Q1 protein at positions 70 and 78 which are identical to those in VACV N1. In total, CPXV Q1 contains five lysine residues which are homologous to VACV N1, all of which were found to be ubiquitinated in CPXV HumBer and four of which found to be ubiquitinated in HumGri, RatKre and RatHei. The remaining five CPXV proteins assigned to host–virus interaction include A44, D12, G13, J1 (VACV VH1) and CPXV N1 protein. VH1 is a viral serine/threonine protein phosphatase which is located in LBs and requires a functional proteasome for activity, presumably to release the enzyme from the LBs<sup>3</sup>. We could show that J1, the CPXV homologue of VH1, contains six conserved ubiquitination positions, indicating an ubiquitin-dependent regulation of J1.

**Transcription.** The OPV DNA-directed RNA polymerase (Pol) is composed of eight subunits displaying similarity to the eukaryotic polymerase<sup>4,5</sup>. Especially, the two large subunits O4 and A25 display homology to the eukaryotic polymerase subunits<sup>6</sup>. Additionally, the F4 subunit shows homology to the eukaryotic transcription elongation factor SII<sup>7</sup>. Of the eight CPXV Pol subunits, five contain conserved ubiquitination sites including O4 (147 kDa), A25 (133 kDa), A30 (35 kDa), F4 (30 kDa) and A6 (19 kDa). The eukaryotic Pol II is known to become K63-polyubiquitinated following DNA damage, for example, and ubiquitination of Pol II in eukaryotes is also a mechanism of transcriptional regulation<sup>8-10</sup>. Considering the given homology between eukaryotic and OPV Pol, a similar regulation mechanism might also apply to OPV.

Besides subunits of the CPXV Pol itself, also viral transcription factors of all three classes contain ubiquitination sites. These include the A8 protein, a subunit of the early transcription factor, the A24 protein, an intermediate transcription factor subunit, and A1, a viral late transcription factor. Eukaryotic transcription factors seem to be activated and also tagged for degradation by ubiquitination<sup>11,12</sup>, but no mechanism has been described for OPV yet. Furthermore, the late transcription elongation factor H3, the transcription termination protein A18 and the 2'-O-methyltransferase O1 possess conserved ubiquitination sites.

**DNA replication.** Ubiquitination is also involved in CPXV DNA replication<sup>13</sup>. The viral DNA ligase A53, Holliday junction resolvase A23 and the putative nuclease H5 contain conserved ubiquitination positions. Interestingly, the E5 protein, a homologue to the VACV D5 protein, which has been identified as the VACV genome uncoating factor<sup>14</sup>, contains two conserved ubiquitination sites that might be important for uncoating activity as discussed later on.

**Membrane.** Two membrane proteins A14 and A17 as well as two EEV glycoproteins A35 and B4 contain conserved ubiquitination sites. Although purified IMV particles were analyzed and the co-purification of EEV particles seems unlikely because of their unstable outer membrane<sup>15</sup>, it has been shown that EEV proteins can be detected in IMV virion preparations<sup>16</sup>. Furthermore, the scaffold protein E13 and the H2 protein belonging to the entry/fusion complex are ubiquitinated.

**Virus entry into host cell.** Three CPXV proteins associated with entry into the host cell were identified to be ubiquitinated. These proteins include the cell fusion protein A28, the IMV heparin-binding surface protein J3 and the myristoylated protein H10.

**Morphogenesis.** Proteins with conserved ubiquitination sites assigned to morphogenesis comprise the protein F8, metalloendopeptidase H1, assembly protein H8, telomere-binding protein L1 and the virion protein S1.

**Unknown.** Also ubiquitination sites on CPXV proteins A50, A52, A7, B2, C3 and F6 of unknown function were identified. A7 is known to locate in the core<sup>17</sup> containing, with 7 diGly(K) sites, the greatest number of ubiquitination sites in unknown CPXV proteins.

**Protein processing, viral reproduction and others.** This summarized functional term includes the H4 protein, G17 protein, L7 cysteine proteinase and A26 A-type inclusion protein. VACV homologs of the oxidoreductase H4 (Glutaredoxin) and the phosphoprotein G17 have been identified to be part of the LBs<sup>3</sup>. F17 is known to be degraded in a proteasome-dependent manner and suggested to be an LB scaffold protein<sup>3</sup>. The sequence of CPXV G17 is identical to that of the VACV homologue F17 except for amino acid position 83 and contains 7 lysine residues at positions 17, 25, 28, 41, 47, 50 and 74. Five distinct ubiquitination sites of VACV F17 on K25, K28, K41, K47 and K50 have been previously identified by MS<sup>3</sup>. Of those positions, we could identify K25 as a conserved ubiquitination site in CPXV and furthermore identified two additional conserved sites at K17 and K74. In contrast, we were not able to identify ubiquitination at K28 and K41 for CPXV.

## **2. Viral proteins degraded by the proteasome**

Besides the proteasome-dependent degradation of proteins associated with reduction of prereplication sites<sup>14</sup>, a notable number of viral BTB/kelch proteins were found to be regulated by the UPS. Cellular proteins of the BTB/kelch family act as adaptor proteins by an N-terminal BTB domain which interacts with cullin-3 ubiquitin ligase (CUL3) and a C-terminal

kelch domain recruiting the substrate to be targeted for proteasomal degradation<sup>18,19</sup>. CPXV code for six BTB/kelch proteins: A57, B9, B19, C18, D11 and G3. Our data demonstrates that all of the CPXV BTB/kelch proteins except for A57 are degraded in a proteasome-dependent manner early in infection. For A57, B19, C18 and G3 the interaction with the cellular CUL3-containing CRL complex has been shown<sup>18</sup>, but so far no substrate of CPXV BTB/kelch proteins has been identified and the distinct role remains unclear. Mercer et al. reported that CUL3-mediated ubiquitination is required for VACV DNA replication<sup>13</sup>, but as CPXV BTB/kelch proteins are not essential for CPXV replication<sup>20</sup>, they are not likely to be the according adapter molecules in this context. However, deletion of CPXV BTB/kelch genes D11L, C18L, G3L and A57R has been shown to lead to altered host range and reduced virulence in mice, illustrating their importance in CPXV infection<sup>21</sup>.

Furthermore, in the context of protein ubiquitination, CPXV encode 13 proteins belonging to the ANK/PRANC protein family which interact with the cellular cullin-1 ubiquitin ligase complex (SCF)<sup>18</sup>. These proteins are characterized by five to ten ankyrin repeats (ANK) at the N-terminus that mediate specific protein–protein interactions and a PRANC (C-terminal pox protein repeat of ankyrin C-terminus) domain similar to the cellular F-box domain<sup>18,19</sup>. By homology to the F-box domain, ANK/PRANC proteins are suspected to be substrate adaptors for SCF, although no substrate has been identified yet<sup>18,19</sup>. Additionally, the inhibition of SCF-mediated ubiquitination by binding of OPV ANK/PRANC proteins to SCF has been proposed<sup>19</sup>. Out of the 13 ANK/PRANC proteins, we identified five that are stabilized upon proteasome inhibition, indicating their proteasomal degradation in non-inhibitor-treated cells. These proteins include four proteins of unknown function (C1, C3, D14 and K1) as well as the 2'-O-methyltransferase O1. It has also been reported that siRNA-mediated knockdown of CUL-1 has no impact on VACV yield<sup>13</sup>. In agreement with this, CPXV ANK/PRANC proteins are not essential for replication<sup>20</sup> and rather may play a role in host range as shown for C9 (CP77)<sup>22</sup>.

The presumed LB scaffold protein F17 (CPXV G17) is known to be degraded by the proteasome early in infection<sup>3</sup>, but we were not able to show the degradation of G17. This was because we did not detect any diGly(K) peptide of G17 in our experiment with HeLa cells, although we previously detected three conserved ubiquitination sites in G17.

Moreover, we found that the CPXV ubiquitin p28-like ligase (C7) is degraded in a proteasome-dependent manner at an early stage of infection. P28 localizes with ubiquitin in VF<sup>23,24</sup> and is known to be regulated by autoubiquitination and proteasomal degradation<sup>23</sup>, confirming our results.

## References Supplementary Discussion

1. Gonzalez-Santamaria, J. *et al.* Regulation of Vaccinia Virus E3 Protein by Small Ubiquitin-Like Modifier Proteins. *J. Virol.* **85**, 12890-12900 (2011).
2. Maluquer de Motes, C., Schiffner, T., Sumner, R. P. & Smith, G. L. Vaccinia virus virulence factor N1 can be ubiquitylated on multiple lysine residues. *J. Gen. Virol.* **95**, 2038-2049 (2014).
3. Schmidt, F. I. *et al.* Vaccinia virus entry is followed by core activation and proteasome-mediated release of the immunomodulatory effector VH1 from lateral bodies. *Cell Rep.* **4**, 464-476 (2013).
4. Knutson, B. A. & Broyles, S. S. Expansion of poxvirus RNA polymerase subunits sharing homology with corresponding subunits of RNA polymerase II. *Virus Genes* **36**, 307-311(2008).
5. Moss, B., Ahn, B. Y., Amegadzie, B., Gershon, P. D. & Keck, J. G. Cytoplasmic transcription system encoded by vaccinia virus. *J. Biol. Chem.* **266**, 1355-1358 (1991).
6. Ahn, B. Y., Gershon, P. D. & Moss, B. RNA polymerase-associated protein Rap94 confers promoter specificity for initiating transcription of vaccinia virus early stage genes. *J. Biol. Chem.* **269**, 7552-7557 (1994).
7. Ahn, B. Y., Gershon, P. D., Jones, E. V. & Moss, B. Identification of rpo30, a vaccinia virus RNA polymerase gene with structural similarity to a eucaryotic transcription elongation factor. *Mol. Cell. Biol.* **10**, 5433-5441 (1990).
8. Conaway, R. C., Brower, C. S. & Conaway, J. W. Emerging roles of ubiquitin in transcription regulation. *Science* **296**, 1254-1258 (2002).
9. Harreman, M. *et al.* Distinct ubiquitin ligases act sequentially for RNA polymerase II polyubiquitylation. *Proc. Natl. Acad. Sci. U. S. A.* **106**, 20705-20710 (2009).
10. Lee, K. B. & Sharp, P. A. Transcription-dependent polyubiquitination of RNA polymerase II requires lysine 63 of ubiquitin. *Biochemistry* **43**, 15223-15229 (2004).
11. Thomas, D. & Tyers, M. Transcriptional regulation: Kamikaze activators. *Curr. Biol.* **10**, R341-343 (2000).
12. Salghetti, S. E., Caudy, A. A., Chenoweth, J. G. & Tansey, W. P. Regulation of transcriptional activation domain function by ubiquitin. *Science* **293**, 1651-1653 (2001).
13. Mercer, J. *et al.* RNAi screening reveals proteasome- and Cullin3-dependent stages in vaccinia virus infection. *Cell Rep.* **2**, 1036-1047 (2012).
14. Kilcher, S. *et al.* siRNA screen of early poxvirus genes identifies the AAA+ ATPase D5 as the virus genome-uncoating factor. *Cell Host Microbe* **15**, 103-112 (2014).
15. Bidgood, S. R. & Mercer, J. Cloak and Dagger: Alternative Immune Evasion and Modulation Strategies of Poxviruses. *Viruses* **7**, 4800-4825 (2015).
16. Doellinger, J., Schaade, L. & Nitsche, A. Comparison of the Cowpox Virus and Vaccinia Virus Mature Virion Proteome: Analysis of the Species- and Strain-Specific Proteome. *PLoS One* **10**, e0141527 (2015).
17. Meng, X., Embry, A., Sochia, D. & Xiang, Y. Vaccinia virus A6L encodes a virion core protein required for formation of mature virion. *J. Virol.* **81**, 1433-1443 (2007).
18. Shchelkunov, S. N. Interaction of orthopoxviruses with the cellular ubiquitin-ligase system. *Virus Genes* **41**, 309-318 (2010).
19. Barry, M. *et al.* Poxvirus exploitation of the ubiquitin-proteasome system. *Viruses* **2**, 2356-2380 (2010).
20. Xu, Z., Zikos, D., Osterrieder, N. & Tischer, B. K. Generation of a complete single-gene knockout bacterial artificial chromosome library of cowpox virus and identification of its essential genes. *J. Virol.* **88**, 490-502, (2014).
21. Kochneva, G., Kolosova, I., Maksyutova, T., Ryabchikova, E. & Shchelkunov, S. Effects of deletions of kelch-like genes on cowpox virus biological properties. *Arch. Virol.* **150**, 1857-1870 (2005).
22. Spohner, D., Gillard, S., Drillien, R. & Kirn, A. A cowpox virus gene required for multiplication in Chinese hamster ovary cells. *J. Virol.* **62**, 1297-1304 (1988).
23. Mottet, K., Bareiss, B., Milne, C. D. & Barry, M. The poxvirus encoded ubiquitin ligase, p28, is regulated by proteasomal degradation and autoubiquitination. *Virology* **468-470**, 363-378 (2014).
24. Nerenberg, B. T. *et al.* The poxviral RING protein p28 is a ubiquitin ligase that targets ubiquitin to viral replication factories. *J. Virol.* **79**, 597-601 (2005).

## B) Supplementary Tables

**Table S1: LC-MS/MS analysis of CPXV mature virion ubiquitinome: data overview**

| Sample      | MS/MS | PSMs | id [%] | Peptide groups | Protein groups | DiGly(K) peptides | Viral diGly(K) peptide ids <sup>1</sup> | Human diGly(K) peptide ids <sup>a</sup> |
|-------------|-------|------|--------|----------------|----------------|-------------------|-----------------------------------------|-----------------------------------------|
| CPXV_BR     | 11925 | 3321 | 27.8   | 1940           | 882            | 889               | 249                                     | 352                                     |
| CPXV_HumBer | 11918 | 2804 | 23.5   | 1698           | 727            | 863               | 511                                     | 352                                     |
| CPXV_HumGri | 14443 | 4075 | 28.2   | 2270           | 916            | 1230              | 683                                     | 547                                     |
| CPXV_RatHei | 12088 | 3839 | 31.8   | 2254           | 951            | 726               | 491                                     | 235                                     |
| CPXV_RatKre | 14579 | 4336 | 29.7   | 2540           | 1149           | 656               | 410                                     | 246                                     |

<sup>a</sup> Contains redundant diGly(K) sites

**Table S2: Origin of diGly(K) peptides**

| diGly peptide area [%] <sup>a</sup> | Ber  | Kre  | BR   | Gri  | Hei  | Mean | SD <sup>b</sup> |
|-------------------------------------|------|------|------|------|------|------|-----------------|
| Viral                               | 32.5 | 39.1 | 9.6  | 45.1 | 44.8 | 34.2 | 14.7            |
| Human/contaminant                   | 5.5  | 5.6  | 15.6 | 6.8  | 6.2  | 7.9  | 4.3             |
| Ubiquitin                           | 62.0 | 55.3 | 74.8 | 48.1 | 49.0 | 57.9 | 11.0            |

<sup>a</sup> % of total diGly(K) peptide area

<sup>b</sup> Standard deviation

**Table S3: Quantification of lysine linkages using peptide areas**

| Lysine number | CPXV RatKre | CPXV BR | CPXV HumGri | CPXV RatHei | CPXV HumBer | Mean | Standard deviation |
|---------------|-------------|---------|-------------|-------------|-------------|------|--------------------|
| 6             | 5.4         | 5.2     | 5.8         | 4.1         | 2.2         | 4.5  | 1.5                |
| 11            | 6.6         | 8.7     | 9.9         | 9.3         | 5.0         | 7.9  | 2.0                |
| 27            | 0.5         | 0.7     | 0.7         | 0.7         | 0.6         | 0.7  | 0.1                |
| 29            | 1.2         | 0.5     | 0.8         | 1.2         | 0.6         | 0.9  | 0.3                |
| 33            | 0.8         | 0.2     | 0.1         | 0.0         | 0.0         | 0.2  | 0.3                |
| 48            | 58.7        | 60.5    | 32.0        | 48.9        | 63.7        | 52.8 | 12.8               |
| 63            | 26.8        | 24.3    | 50.6        | 35.9        | 27.9        | 33.1 | 10.7               |

**Table S4: Identified ubiquitination sites in five CPXV strains.**

| CPXV strain | Gene CPXV GRI-90 | # PSMs | # Unique Peptides | diGly(K) count | diGly(K) Positions                                                                                                       |
|-------------|------------------|--------|-------------------|----------------|--------------------------------------------------------------------------------------------------------------------------|
| CPXVHumBer  | A11L             | 88     | 38                | 19             | diGly [K149; K162; K163; K188; K193; K366; K369; K382; K384; K436; K462; K509; K558; K737; K757; K789; K795; K856; K876] |
| CPXVHumBer  | A53R             | 22     | 13                | 15             | diGly [K60; K64; K95; K184; K243; K256; K262; K267; K342; K377; K394; K452; K472; K475; K540]                            |
| CPXVHumBer  | F6R              | 31     | 19                | 13             | diGly [K90; K94; K112; K168; K287; K317; K372; K456; K460; K490; K552; K555; K556]                                       |
| CPXVHumBer  | A7L              | 51     | 17                | 12             | diGly [K16; K86; K91; K136; K137; K194; K297; K299; K318; K321; K331; K353]                                              |
| CPXVHumBer  | A4L              | 74     | 26                | 11             | diGly [K82; K83; K111; K164; K185; K189; K270; K311; K407; K471; K507]                                                   |
| CPXVHumBer  | N4R              | 28     | 11                | 10             | diGly [K127; K153; K170; K175; K202; K204; K207; K212; K240; K250]                                                       |
| CPXVHumBer  | A26L             | 24     | 10                | 10             | diGly [K15; K52; K77; K233; K238; K245; K246; K248; K254; K313]                                                          |
| CPXVHumBer  | E13L             | 25     | 13                | 10             | diGly [K172; K225; K231; K281; K354; K377; K419; K436; K469; K545]                                                       |
| CPXVHumBer  | F2L              | 19     | 11                | 10             | diGly [K64; K94; K103; K229; K238; K443; K480; K510; K523; K552]                                                         |
| CPXVHumBer  | H1L              | 19     | 11                | 10             | diGly [K7; K96; K109; K172; K369; K370; K478; K483; K584; K585]                                                          |
| CPXVHumBer  | J4L              | 15     | 9                 | 9              | diGly [K16; K242; K300; K316; K516; K627; K643; K646; K667]                                                              |
| CPXVHumBer  | A8L              | 18     | 12                | 9              | diGly [K186; K205; K362; K381; K394; K468; K513; K641; K647]                                                             |
| CPXVHumBer  | H8L              | 28     | 10                | 9              | diGly [K36; K38; K99; K224; K246; K265; K268; K292; K350]                                                                |
| CPXVHumBer  | L1L              | 22     | 11                | 9              | diGly [K59; K64; K99; K100; K109; K174; K203; K232; K290]                                                                |
| CPXVHumBer  | J1L              | 27     | 11                | 9              | diGly [K8; K22; K40; K51; K53; K98; K159; K165; K170]                                                                    |
| CPXVHumBer  | A25R             | 13     | 10                | 8              | diGly [K60; K116; K129; K139; K299; K452; K762; K800]                                                                    |
| CPXVHumBer  | A44R             | 36     | 9                 | 7              | diGly [K13; K16; K26; K29; K42; K59; K109]                                                                               |
| CPXVHumBer  | A24R             | 10     | 6                 | 7              | diGly [K139; K154; K283; K322; K324; K330; K357]                                                                         |
| CPXVHumBer  | M1L              | 15     | 8                 | 7              | diGly [K21; K242; K247; K253; K259; K262; K269]                                                                          |

|            |      |    |    |   |                                                |
|------------|------|----|----|---|------------------------------------------------|
| CPXVHumBer | J3L  | 22 | 10 | 7 | diGly [K39; K47; K109; K148; K164; K225; K254] |
| CPXVHumBer | A17L | 16 | 7  | 6 | diGly [K11; K113; K116; K133; K258; K278]      |
| CPXVHumBer | C3L  | 18 | 9  | 6 | diGly [K14; K60; K258; K287; K288; K666]       |
| CPXVHumBer | B8R  | 10 | 6  | 6 | diGly [K172; K174; K187; K197; K203; K217]     |
| CPXVHumBer | A22R | 13 | 5  | 6 | diGly [K240; K243; K248; K306; K317; K349]     |
| CPXVHumBer | B2R  | 10 | 6  | 6 | diGly [K32; K142; K198; K240; K363; K370]      |
| CPXVHumBer | E11L | 12 | 7  | 6 | diGly [K32; K221; K280; K341; K522; K597]      |
| CPXVHumBer | H4L  | 17 | 7  | 6 | diGly [K54; K81; K96; K99; K108; K113]         |
| CPXVHumBer | S1R  | 12 | 6  | 6 | diGly [K74; K82; K87; K114; K115; K146]        |
| CPXVHumBer | G13L | 29 | 9  | 6 | diGly [K75; K168; K226; K231; K281; K368]      |
| CPXVHumBer | E8L  | 9  | 6  | 5 | diGly [K14; K32; K100; K211; K224]             |
| CPXVHumBer | C1L  | 14 | 8  | 5 | diGly [K185; K346; K363; K387; K398]           |
| CPXVHumBer | Q1L  | 16 | 4  | 5 | diGly [K25; K26; K70; K78; K117]               |
| CPXVHumBer | L8R  | 8  | 7  | 5 | diGly [K32; K152; K166; K364; K378]            |
| CPXVHumBer | A27L | 14 | 6  | 5 | diGly [K36; K37; K61; K296; K297]              |
| CPXVHumBer | F9L  | 5  | 5  | 5 | diGly [K408; K642; K818; K844; K959]           |
| CPXVHumBer | A47L | 7  | 4  | 5 | diGly [K45; K47; K151; K160; K296]             |
| CPXVHumBer | M4L  | 8  | 6  | 5 | diGly [K89; K300; K327; K380; K392]            |
| CPXVHumBer | A35R | 6  | 5  | 4 | diGly [K111; K119; K125; K145]                 |
| CPXVHumBer | E5R  | 9  | 6  | 4 | diGly [K124; K390; K647; K649]                 |
| CPXVHumBer | F8R  | 10 | 4  | 4 | diGly [K13; K165; K180; K187]                  |
| CPXVHumBer | A28L | 17 | 7  | 4 | diGly [K37; K48; K98; K99]                     |
| CPXVHumBer | B11R | 9  | 4  | 4 | diGly [K49; K102; K159; K232]                  |
| CPXVHumBer | A13L | 5  | 3  | 4 | diGly [K61; K63; K88; K167]                    |
| CPXVHumBer | B1R  | 6  | 3  | 4 | diGly [K62; K160; K162; K189]                  |
| CPXVHumBer | C8L  | 8  | 5  | 4 | diGly [K66; K76; K93; K121]                    |
| CPXVHumBer | A19R | 7  | 5  | 4 | diGly [K81; K88; K290; K297]                   |
| CPXVHumBer | G16L | 5  | 3  | 4 | diGly [K92; K189; K230; K231]                  |
| CPXVHumBer | L7L  | 9  | 7  | 4 | diGly [K97; K129; K155; K160]                  |
| CPXVHumBer | E1R  | 9  | 5  | 3 | diGly [K107; K332; K797]                       |
| CPXVHumBer | C15L | 7  | 3  | 3 | diGly [K11; K13; K60]                          |
| CPXVHumBer | C9L  | 5  | 3  | 3 | diGly [K112; K320; K454]                       |
| CPXVHumBer | F7R  | 8  | 3  | 3 | diGly [K16; K69; K77]                          |
| CPXVHumBer | F1L  | 4  | 3  | 3 | diGly [K166; K327; K451]                       |



|            |      |    |   |   |                          |
|------------|------|----|---|---|--------------------------|
| CPXVHumBer | G17R | 15 | 5 | 3 | diGly [K17; K25; K74]    |
| CPXVHumBer | A12R | 9  | 5 | 3 | diGly [K171; K186; K190] |
| CPXVHumBer | E6R  | 3  | 3 | 3 | diGly [K198; K213; K392] |
| CPXVHumBer | B3R  | 5  | 2 | 3 | diGly [K205; K206; K266] |
| CPXVHumBer | H5R  | 6  | 4 | 3 | diGly [K213; K282; K353] |
| CPXVHumBer | C18L | 3  | 3 | 3 | diGly [K29; K173; K486]  |
| CPXVHumBer | F10R | 4  | 3 | 3 | diGly [K4; K84; K91]     |
| CPXVHumBer | B4R  | 7  | 3 | 3 | diGly [K41; K43; K259]   |
| CPXVHumBer | A23R | 6  | 3 | 3 | diGly [K44; K149; K167]  |
| CPXVHumBer | F3L  | 7  | 4 | 3 | diGly [K45; K108; K176]  |
| CPXVHumBer | A29L | 5  | 2 | 3 | diGly [K47; K70; K72]    |
| CPXVHumBer | F4L  | 6  | 4 | 3 | diGly [K60; K67; K80]    |
| CPXVHumBer | G4L  | 5  | 3 | 3 | diGly [K64; K158; K309]  |
| CPXVHumBer | J2R  | 4  | 3 | 3 | diGly [K66; K88; K117]   |
| CPXVHumBer | H3R  | 3  | 2 | 2 | diGly [K101; K107]       |
| CPXVHumBer | J7R  | 3  | 2 | 2 | diGly [K102; K135]       |
| CPXVHumBer | B20R | 3  | 2 | 2 | diGly [K118; K274]       |
| CPXVHumBer | B15L | 2  | 2 | 2 | diGly [K122; K282]       |
| CPXVHumBer | O2R  | 2  | 1 | 2 | diGly [K134; K135]       |
| CPXVHumBer | M2L  | 2  | 2 | 2 | diGly [K139; K270]       |
| CPXVHumBer | A52R | 5  | 2 | 2 | diGly [K143; K148]       |
| CPXVHumBer | A5L  | 7  | 4 | 2 | diGly [K18; K27]         |
| CPXVHumBer | N3L  | 7  | 6 | 2 | diGly [K18; K272]        |
| CPXVHumBer | G11L | 3  | 2 | 2 | diGly [K18; K315]        |
| CPXVHumBer | E3R  | 3  | 2 | 2 | diGly [K192; K231]       |
| CPXVHumBer | H10R | 2  | 2 | 2 | diGly [K202; K236]       |
| CPXVHumBer | B7R  | 2  | 2 | 2 | diGly [K221; K228]       |
| CPXVHumBer | O1R  | 10 | 7 | 2 | diGly [K226; K234]       |
| CPXVHumBer | E2L  | 4  | 2 | 2 | diGly [K31; K146]        |
| CPXVHumBer | O4R  | 4  | 2 | 2 | diGly [K37; K109]        |
| CPXVHumBer | A6R  | 4  | 2 | 2 | diGly [K43; K70]         |
| CPXVHumBer | A14L | 12 | 4 | 2 | diGly [K49; K56]         |
| CPXVHumBer | A36R | 6  | 2 | 2 | diGly [K50; K64]         |
| CPXVHumBer | B17R | 2  | 2 | 2 | diGly [K51; K202]        |
| CPXVHumBer | I3R  | 3  | 3 | 2 | diGly [K511; K542]       |
| CPXVHumBer | A50L | 3  | 2 | 2 | diGly [K66; K83]         |
| CPXVHumBer | B12R | 3  | 2 | 2 | diGly [K67; K104]        |
| CPXVHumBer | H9R  | 7  | 4 | 2 | diGly [K75; K180]        |
| CPXVHumBer | E12L | 4  | 2 | 2 | diGly [K88; K218]        |
| CPXVHumBer | H2L  | 3  | 2 | 2 | diGly [K89; K111]        |
| CPXVHumBer | D12L | 5  | 3 | 2 | diGly [K94; K106]        |
| CPXVHumBer | B21R | 3  | 1 | 1 | diGly [K100]             |
| CPXVHumBer | G1L  | 3  | 2 | 1 | diGly [K103]             |
| CPXVHumBer | A40L | 1  | 1 | 1 | diGly [K110]             |
| CPXVHumBer | A34R | 4  | 2 | 1 | diGly [K123]             |

|            |      |    |    |    |                                                                                                                          |
|------------|------|----|----|----|--------------------------------------------------------------------------------------------------------------------------|
| CPXVHumBer | Q2L  | 2  | 2  | 1  | diGly [K126]                                                                                                             |
| CPXVHumBer | E9R  | 2  | 1  | 1  | diGly [K128]                                                                                                             |
| CPXVHumBer | H7R  | 2  | 1  | 1  | diGly [K132]                                                                                                             |
| CPXVHumBer | A59R | 18 | 7  | 1  | diGly [K134]                                                                                                             |
| CPXVHumBer | A3L  | 1  | 1  | 1  | diGly [K15]                                                                                                              |
| CPXVHumBer | A30L | 4  | 1  | 1  | diGly [K174]                                                                                                             |
| CPXVHumBer | A2L  | 3  | 2  | 1  | diGly [K175]                                                                                                             |
| CPXVHumBer | A18L | 3  | 1  | 1  | diGly [K180]                                                                                                             |
| CPXVHumBer | L3L  | 3  | 2  | 1  | diGly [K182]                                                                                                             |
| CPXVHumBer | J5R  | 3  | 2  | 1  | diGly [K198]                                                                                                             |
| CPXVHumBer | N1R  | 3  | 1  | 1  | diGly [K21]                                                                                                              |
| CPXVHumBer | F5R  | 2  | 1  | 1  | diGly [K263]                                                                                                             |
| CPXVHumBer | C16L | 1  | 1  | 1  | diGly [K271]                                                                                                             |
| CPXVHumBer | A38R | 1  | 1  | 1  | diGly [K31]                                                                                                              |
| CPXVHumBer | G15L | 1  | 1  | 1  | diGly [K31]                                                                                                              |
| CPXVHumBer | G3L  | 3  | 2  | 1  | diGly [K320]                                                                                                             |
| CPXVHumBer | G5L  | 1  | 1  | 1  | diGly [K321]                                                                                                             |
| CPXVHumBer | E7R  | 1  | 1  | 1  | diGly [K33]                                                                                                              |
| CPXVHumBer | C6L  | 1  | 1  | 1  | diGly [K331]                                                                                                             |
| CPXVHumBer | B19R | 1  | 1  | 1  | diGly [K340]                                                                                                             |
| CPXVHumBer | A1L  | 1  | 1  | 1  | diGly [K36]                                                                                                              |
| CPXVHumBer | G12L | 2  | 2  | 1  | diGly [K365]                                                                                                             |
| CPXVHumBer | R1L  | 2  | 2  | 1  | diGly [K366]                                                                                                             |
| CPXVHumBer | A37R | 1  | 1  | 1  | diGly [K37]                                                                                                              |
| CPXVHumBer | C14L | 4  | 1  | 1  | diGly [K49]                                                                                                              |
| CPXVHumBer | A57R | 1  | 1  | 1  | diGly [K547]                                                                                                             |
| CPXVHumBer | C17L | 4  | 2  | 1  | diGly [K62]                                                                                                              |
| CPXVHumBer | A51R | 2  | 1  | 1  | diGly [K70]                                                                                                              |
| CPXVHumBer | A58R | 2  | 2  | 1  | diGly [K72]                                                                                                              |
| CPXVHumBer | B13R | 1  | 1  | 1  | diGly [K73]                                                                                                              |
| CPXVHumBer | G10L | 2  | 2  | 1  | diGly [K79]                                                                                                              |
| CPXVHumBer | M3L  | 1  | 1  | 1  | diGly [K82]                                                                                                              |
| CPXVHumBer | C7R  | 2  | 1  | 1  | diGly [K84]                                                                                                              |
| CPXVBR     | A11L | 93 | 33 | 19 | diGly [K149; K162; K163; K189; K194; K367; K370; K383; K385; K437; K511; K560; K666; K739; K759; K791; K797; K803; K850] |
| CPXVBR     | A4L  | 49 | 20 | 8  | diGly [K82; K83; K111; K185; K189; K270; K311; K471]                                                                     |
| CPXVBR     | N4R  | 23 | 11 | 8  | diGly [K153; K175; K202; K204; K207; K212; K240; K250]                                                                   |
| CPXVBR     | A26L | 16 | 7  | 7  | diGly [K15; K52; K77; K239; K246; K255; K314]                                                                            |
| CPXVBR     | A7L  | 20 | 8  | 7  | diGly [K86; K136; K137; K194; K297; K299; K331]                                                                          |
| CPXVBR     | A44R | 21 | 9  | 6  | diGly [K13; K16; K26; K29; K42; K59]                                                                                     |

|        |      |    |   |   |                                            |
|--------|------|----|---|---|--------------------------------------------|
| CPXVBR | E13L | 14 | 7 | 6 | diGly [K172; K231; K354; K419; K436; K469] |
| CPXVBR | G13L | 8  | 7 | 6 | diGly [K68; K168; K226; K231; K355; K368]  |
| CPXVBR | H1L  | 17 | 7 | 6 | diGly [K7; K96; K109; K369; K370; K478]    |
| CPXVBR | J1L  | 20 | 8 | 6 | diGly [K22; K40; K51; K159; K165; K170]    |
| CPXVBR | L1L  | 18 | 9 | 6 | diGly [K59; K100; K109; K174; K203; K232]  |
| CPXVBR | A24R | 5  | 5 | 5 | diGly [K139; K154; K283; K330; K357]       |
| CPXVBR | A25R | 10 | 7 | 5 | diGly [K60; K116; K129; K139; K455]        |
| CPXVBR | A53R | 8  | 5 | 5 | diGly [K21; K60; K377; K394; K469]         |
| CPXVBR | C8L  | 7  | 5 | 5 | diGly [K60; K66; K76; K93; K102]           |
| CPXVBR | H8L  | 16 | 7 | 5 | diGly [K36; K224; K246; K268; K292]        |
| CPXVBR | J3L  | 15 | 8 | 5 | diGly [K47; K109; K148; K225; K254]        |
| CPXVBR | P1L  | 10 | 5 | 5 | diGly [K47; K185; K198; K214; K321]        |
| CPXVBR | A27L | 11 | 4 | 4 | diGly [K36; K37; K61; K93]                 |
| CPXVBR | E8L  | 12 | 7 | 4 | diGly [K22; K100; K211; K224]              |
| CPXVBR | F8R  | 11 | 6 | 4 | diGly [K13; K165; K187; K267]              |
| CPXVBR | J4L  | 8  | 5 | 4 | diGly [K16; K242; K316; K577]              |
| CPXVBR | A14L | 14 | 5 | 3 | diGly [K49; K56; K67]                      |
| CPXVBR | A19R | 5  | 3 | 3 | diGly [K81; K88; K464]                     |
| CPXVBR | A8L  | 8  | 5 | 3 | diGly [K362; K513; K647]                   |
| CPXVBR | B7R  | 5  | 3 | 3 | diGly [K135; K228; K241]                   |
| CPXVBR | D12L | 10 | 3 | 3 | diGly [K96; K108; K109]                    |
| CPXVBR | F6R  | 8  | 7 | 3 | diGly [K90; K94; K445]                     |
| CPXVBR | G17R | 14 | 5 | 3 | diGly [K17; K25; K74]                      |
| CPXVBR | H10R | 3  | 3 | 3 | diGly [K230; K236; K308]                   |
| CPXVBR | H3R  | 3  | 3 | 3 | diGly [K85; K107; K170]                    |
| CPXVBR | H4L  | 7  | 3 | 3 | diGly [K54; K96; K99]                      |
| CPXVBR | H5R  | 4  | 4 | 3 | diGly [K7; K282; K353]                     |
| CPXVBR | L7L  | 4  | 3 | 3 | diGly [K53; K97; K129]                     |
| CPXVBR | M2L  | 5  | 3 | 3 | diGly [K69; K139; K270]                    |
| CPXVBR | M4L  | 7  | 5 | 3 | diGly [K86; K300; K327]                    |
| CPXVBR | S1R  | 4  | 3 | 3 | diGly [K74; K82; K87]                      |
| CPXVBR | A17L | 5  | 2 | 2 | diGly [K11; K258]                          |
| CPXVBR | A29L | 4  | 1 | 2 | diGly [K70; K72]                           |
| CPXVBR | A35R | 3  | 2 | 2 | diGly [K111; K125]                         |
| CPXVBR | A52R | 3  | 2 | 2 | diGly [K143; K148]                         |
| CPXVBR | B4R  | 2  | 2 | 2 | diGly [K41; K241]                          |
| CPXVBR | C3L  | 2  | 1 | 2 | diGly [K273; K274]                         |

|            |      |     |    |    |                                                              |
|------------|------|-----|----|----|--------------------------------------------------------------|
| CPXVBR     | D1L  | 4   | 2  | 2  | diGly [K129; K216]                                           |
| CPXVBR     | D6L  | 3   | 3  | 2  | diGly [K4; K10]                                              |
| CPXVBR     | E5R  | 3   | 2  | 2  | diGly [K124; K647]                                           |
| CPXVBR     | G4L  | 3   | 2  | 2  | diGly [K138; K295]                                           |
| CPXVBR     | G7L  | 3   | 1  | 2  | diGly [K21; K22]                                             |
| CPXVBR     | H2L  | 2   | 2  | 2  | diGly [K89; K111]                                            |
| CPXVBR     | J7R  | 5   | 2  | 2  | diGly [K102; K135]                                           |
| CPXVBR     | M1L  | 3   | 2  | 2  | diGly [K21; K262]                                            |
| CPXVBR     | O2R  | 2   | 1  | 2  | diGly [K134; K135]                                           |
| CPXVBR     | P2L  | 2   | 2  | 2  | diGly [K121; K123]                                           |
| CPXVBR     | Q1L  | 5   | 2  | 2  | diGly [K70; K78]                                             |
| CPXVBR     | A1L  | 2   | 1  | 1  | diGly [K36]                                                  |
| CPXVBR     | A23R | 1   | 1  | 1  | diGly [K44]                                                  |
| CPXVBR     | A28L | 2   | 2  | 1  | diGly [K37]                                                  |
| CPXVBR     | A30L | 4   | 1  | 1  | diGly [K174]                                                 |
| CPXVBR     | A34R | 1   | 1  | 1  | diGly [K87]                                                  |
| CPXVBR     | A36R | 4   | 1  | 1  | diGly [K64]                                                  |
| CPXVBR     | A47L | 1   | 1  | 1  | diGly [K296]                                                 |
| CPXVBR     | A50L | 1   | 1  | 1  | diGly [K83]                                                  |
| CPXVBR     | A51R | 1   | 1  | 1  | diGly [K181]                                                 |
| CPXVBR     | A58R | 1   | 1  | 1  | diGly [K66]                                                  |
| CPXVBR     | A6R  | 1   | 1  | 1  | diGly [K70]                                                  |
| CPXVBR     | B14R | 2   | 1  | 1  | diGly [K203]                                                 |
| CPXVBR     | B17R | 1   | 1  | 1  | diGly [K45]                                                  |
| CPXVBR     | B2R  | 1   | 1  | 1  | diGly [K370]                                                 |
| CPXVBR     | B3R  | 1   | 1  | 1  | diGly [K266]                                                 |
| CPXVBR     | B6R  | 3   | 2  | 1  | diGly [K178]                                                 |
| CPXVBR     | B8R  | 1   | 1  | 1  | diGly [K222]                                                 |
| CPXVBR     | C12L | 2   | 1  | 1  | diGly [K128]                                                 |
| CPXVBR     | C17L | 3   | 2  | 1  | diGly [K62]                                                  |
| CPXVBR     | C1L  | 1   | 1  | 1  | diGly [K396]                                                 |
| CPXVBR     | C2L  | 2   | 1  | 1  | diGly [K132]                                                 |
| CPXVBR     | C9L  | 1   | 1  | 1  | diGly [K465]                                                 |
| CPXVBR     | E2L  | 2   | 1  | 1  | diGly [K138]                                                 |
| CPXVBR     | F3L  | 1   | 1  | 1  | diGly [K45]                                                  |
| CPXVBR     | F4L  | 4   | 2  | 1  | diGly [K62]                                                  |
| CPXVBR     | G11L | 1   | 1  | 1  | diGly [K315]                                                 |
| CPXVBR     | H9R  | 5   | 3  | 1  | diGly [K73]                                                  |
| CPXVBR     | K1R  | 3   | 1  | 1  | diGly [K474]                                                 |
| CPXVBR     | N1R  | 2   | 1  | 1  | diGly [K21]                                                  |
| CPXVBR     | N3L  | 8   | 4  | 1  | diGly [K272]                                                 |
| CPXVBR     | O1R  | 5   | 4  | 1  | diGly [K234]                                                 |
| CPXVBR     | O4R  | 2   | 2  | 1  | diGly [K37]                                                  |
| CPXVHumGri | A11L | 113 | 39 | 23 | diGly [K149; K162; K163; K188; K193; K366; K369; K382; K384; |

|            |      |    |    |    |                                                                                                                             |
|------------|------|----|----|----|-----------------------------------------------------------------------------------------------------------------------------|
|            |      |    |    |    | K436; K460; K462; K509; K558; K572; K737; K755; K789; K795; K801; K848; K856; K877]                                         |
| CPXVHumGri | C9L  | 40 | 20 | 20 | diGly [K20; K32; K64; K112; K132; K252; K289; K320; K383; K388; K454; K462; K537; K577; K578; K615; K633; K639; K658; K660] |
| CPXVHumGri | A7L  | 62 | 20 | 15 | diGly [K16; K86; K91; K99; K136; K137; K189; K194; K297; K299; K318; K321; K331; K349; K353]                                |
| CPXVHumGri | A8L  | 32 | 17 | 14 | diGly [K15; K54; K186; K205; K362; K381; K393; K394; K427; K467; K468; K513; K641; K647]                                    |
| CPXVHumGri | E13L | 39 | 16 | 14 | diGly [K17; K172; K225; K231; K281; K354; K363; K364; K377; K419; K429; K436; K469; K545]                                   |
| CPXVHumGri | F6R  | 45 | 20 | 14 | diGly [K90; K94; K107; K112; K168; K317; K372; K404; K456; K460; K478; K490; K552; K556]                                    |
| CPXVHumGri | A26L | 33 | 17 | 13 | diGly [K9; K15; K52; K77; K81; K233; K238; K245; K246; K248; K254; K313; K465]                                              |
| CPXVHumGri | A25R | 28 | 16 | 12 | diGly [K3; K60; K109; K116; K129; K139; K165; K299; K390; K452; K455; K882]                                                 |
| CPXVHumGri | A4L  | 81 | 27 | 12 | diGly [K82; K83; K111; K153; K164; K185; K189; K270; K311; K407; K471; K507]                                                |
| CPXVHumGri | G13L | 50 | 16 | 12 | diGly [K68; K70; K75; K110; K111; K168; K226; K231; K281; K355; K356; K368]                                                 |
| CPXVHumGri | L1L  | 33 | 15 | 12 | diGly [K19; K59; K64; K93; K99; K100; K109; K117; K129; K174; K203; K232]                                                   |
| CPXVHumGri | M1L  | 31 | 12 | 12 | diGly [K10; K21; K75; K78; K205; K242; K247; K253; K259; K262; K269; K271]                                                  |
| CPXVHumGri | H8L  | 33 | 12 | 11 | diGly [K36; K38; K224; K240; K246; K268; K278; K292; K344; K350; K364]                                                      |
| CPXVHumGri | O4R  | 19 | 11 | 11 | diGly [K37; K109; K324; K603; K958; K972; K974; K1118; K1119; K1210; K1228]                                                 |
| CPXVHumGri | F2L  | 23 | 10 | 10 | diGly [K64; K103; K229; K289; K475; K480; K510; K523; K552; K707]                                                           |
| CPXVHumGri | J4L  | 26 | 11 | 10 | diGly [K16; K162; K163; K242; K245; K300; K316; K516; K643; K646]                                                           |
| CPXVHumGri | A53R | 18 | 9  | 9  | diGly [K60; K95; K262; K342; K377; K384; K394; K452; K540]                                                                  |

|            |      |    |    |   |                                                              |
|------------|------|----|----|---|--------------------------------------------------------------|
| CPXVHumGri | B11R | 18 | 8  | 9 | diGly [K13; K14; K33; K49; K102; K139; K159; K162; K232]     |
| CPXVHumGri | F9L  | 16 | 9  | 9 | diGly [K408; K435; K642; K650; K734; K818; K844; K901; K959] |
| CPXVHumGri | H1L  | 21 | 10 | 9 | diGly [K7; K96; K109; K369; K370; K420; K478; K483; K488]    |
| CPXVHumGri | J3L  | 30 | 12 | 9 | diGly [K39; K47; K54; K109; K148; K162; K225; K254; K267]    |
| CPXVHumGri | N4R  | 28 | 12 | 9 | diGly [K127; K153; K170; K175; K202; K207; K212; K240; K250] |
| CPXVHumGri | A17L | 20 | 9  | 8 | diGly [K11; K22; K113; K116; K133; K194; K258; K278]         |
| CPXVHumGri | A22R | 15 | 7  | 8 | diGly [K18; K240; K243; K248; K306; K310; K317; K349]        |
| CPXVHumGri | B12R | 17 | 8  | 8 | diGly [K48; K54; K63; K67; K77; K83; K87; K331]              |
| CPXVHumGri | C3L  | 28 | 12 | 8 | diGly [K14; K60; K223; K260; K289; K290; K369; K668]         |
| CPXVHumGri | G10L | 13 | 7  | 8 | diGly [K79; K81; K239; K330; K355; K356; K408; K412]         |
| CPXVHumGri | J1L  | 27 | 11 | 8 | diGly [K8; K22; K40; K51; K98; K159; K165; K170]             |
| CPXVHumGri | A13L | 10 | 7  | 7 | diGly [K22; K28; K61; K63; K88; K155; K167]                  |
| CPXVHumGri | A44R | 38 | 9  | 7 | diGly [K13; K16; K26; K29; K42; K59; K109]                   |
| CPXVHumGri | A47L | 17 | 5  | 7 | diGly [K45; K47; K149; K151; K160; K296; K340]               |
| CPXVHumGri | C1L  | 25 | 10 | 7 | diGly [K183; K344; K359; K361; K372; K385; K396]             |
| CPXVHumGri | E5R  | 19 | 10 | 7 | diGly [K36; K124; K291; K390; K435; K647; K649]              |
| CPXVHumGri | L7L  | 17 | 9  | 7 | diGly [K90; K97; K126; K129; K139; K146; K155]               |
| CPXVHumGri | A24R | 13 | 6  | 6 | diGly [K153; K154; K283; K322; K330; K357]                   |
| CPXVHumGri | B1R  | 12 | 5  | 6 | diGly [K160; K162; K189; K204; K238; K247]                   |
| CPXVHumGri | B8R  | 18 | 8  | 6 | diGly [K172; K174; K187; K197; K203; K217]                   |
| CPXVHumGri | E11L | 14 | 7  | 6 | diGly [K32; K122; K266; K280; K334; K522]                    |
| CPXVHumGri | E1R  | 12 | 8  | 6 | diGly [K107; K332; K433; K635; K730; K797]                   |
| CPXVHumGri | F4L  | 8  | 6  | 6 | diGly [K55; K61; K68; K81; K92; K131]                        |
| CPXVHumGri | H4L  | 22 | 7  | 6 | diGly [K54; K81; K96; K99; K108; K113]                       |
| CPXVHumGri | S1R  | 12 | 7  | 6 | diGly [K74; K82; K83; K87; K114; K146]                       |
| CPXVHumGri | A19R | 7  | 5  | 5 | diGly [K81; K88; K170; K297; K464]                           |

|            |      |    |   |   |                                         |
|------------|------|----|---|---|-----------------------------------------|
| CPXVHumGri | A1L  | 6  | 4 | 5 | diGly [K36; K91; K113; K115; K126]      |
| CPXVHumGri | A28L | 11 | 6 | 5 | diGly [K37; K48; K57; K98; K99]         |
| CPXVHumGri | B22R | 6  | 5 | 5 | diGly [K58; K1308; K1569; K1680; K1744] |
| CPXVHumGri | F8R  | 12 | 6 | 5 | diGly [K13; K180; K187; K201; K267]     |
| CPXVHumGri | G4L  | 10 | 5 | 5 | diGly [K7; K50; K138; K269; K295]       |
| CPXVHumGri | H5R  | 9  | 5 | 5 | diGly [K7; K65; K213; K282; K353]       |
| CPXVHumGri | M2L  | 6  | 5 | 5 | diGly [K69; K139; K185; K194; K270]     |
| CPXVHumGri | N1R  | 9  | 4 | 5 | diGly [K21; K113; K125; K127; K217]     |
| CPXVHumGri | A23R | 10 | 4 | 4 | diGly [K44; K55; K149; K167]            |
| CPXVHumGri | A2L  | 5  | 4 | 4 | diGly [K116; K167; K175; K179]          |
| CPXVHumGri | A33L | 6  | 4 | 4 | diGly [K46; K145; K273; K296]           |
| CPXVHumGri | A35R | 15 | 6 | 4 | diGly [K111; K119; K125; K130]          |
| CPXVHumGri | B4R  | 6  | 2 | 4 | diGly [K41; K43; K259; K262]            |
| CPXVHumGri | B7R  | 7  | 3 | 4 | diGly [K228; K230; K238; K241]          |
| CPXVHumGri | C15L | 11 | 5 | 4 | diGly [K11; K13; K60; K76]              |
| CPXVHumGri | C17L | 6  | 3 | 4 | diGly [K60; K62; K233; K235]            |
| CPXVHumGri | C8L  | 14 | 6 | 4 | diGly [K66; K76; K93; K102]             |
| CPXVHumGri | E2L  | 6  | 4 | 4 | diGly [K38; K58; K138; K146]            |
| CPXVHumGri | E3R  | 5  | 3 | 4 | diGly [K184; K192; K231; K232]          |
| CPXVHumGri | G17R | 29 | 8 | 4 | diGly [K17; K25; K50; K74]              |
| CPXVHumGri | H10R | 8  | 4 | 4 | diGly [K202; K217; K236; K308]          |
| CPXVHumGri | H9R  | 13 | 6 | 4 | diGly [K73; K75; K180; K215]            |
| CPXVHumGri | L8R  | 9  | 6 | 4 | diGly [K32; K152; K166; K242]           |
| CPXVHumGri | N3L  | 12 | 7 | 4 | diGly [K14; K18; K114; K272]            |
| CPXVHumGri | Q1L  | 21 | 4 | 4 | diGly [K25; K26; K70; K78]              |
| CPXVHumGri | A12R | 10 | 5 | 3 | diGly [K170; K185; K189]                |
| CPXVHumGri | A14L | 21 | 6 | 3 | diGly [K49; K56; K67]                   |
| CPXVHumGri | A27L | 14 | 5 | 3 | diGly [K36; K37; K296]                  |
| CPXVHumGri | A29L | 4  | 2 | 3 | diGly [K47; K70; K72]                   |
| CPXVHumGri | A3L  | 8  | 4 | 3 | diGly [K6; K15; K65]                    |
| CPXVHumGri | A51R | 7  | 2 | 3 | diGly [K37; K40; K70]                   |
| CPXVHumGri | A57R | 4  | 3 | 3 | diGly [K137; K430; K541]                |
| CPXVHumGri | B2R  | 6  | 3 | 3 | diGly [K240; K363; K370]                |
| CPXVHumGri | B9R  | 4  | 3 | 3 | diGly [K301; K390; K478]                |
| CPXVHumGri | C19L | 4  | 2 | 3 | diGly [K116; K145; K146]                |
| CPXVHumGri | D12L | 7  | 3 | 3 | diGly [K94; K106; K107]                 |
| CPXVHumGri | E12L | 6  | 3 | 3 | diGly [K83; K88; K218]                  |
| CPXVHumGri | E6R  | 5  | 3 | 3 | diGly [K198; K213; K392]                |
| CPXVHumGri | F7R  | 8  | 3 | 3 | diGly [K16; K70; K78]                   |
| CPXVHumGri | J2R  | 6  | 3 | 3 | diGly [K66; K81; K94]                   |
| CPXVHumGri | J7R  | 5  | 3 | 3 | diGly [K5; K102; K135]                  |
| CPXVHumGri | L6L  | 3  | 2 | 3 | diGly [K6; K274; K275]                  |

|            |      |    |   |   |                          |
|------------|------|----|---|---|--------------------------|
| CPXVHumGri | M4L  | 7  | 4 | 3 | diGly [K327; K380; K392] |
| CPXVHumGri | O1R  | 10 | 6 | 3 | diGly [K226; K234; K235] |
| CPXVHumGri | O2R  | 3  | 2 | 3 | diGly [K7; K134; K135]   |
| CPXVHumGri | R1L  | 6  | 5 | 3 | diGly [K317; K366; K524] |
| CPXVHumGri | A18L | 2  | 1 | 2 | diGly [K180; K187]       |
| CPXVHumGri | A30L | 5  | 2 | 2 | diGly [K116; K174]       |
| CPXVHumGri | A36R | 5  | 2 | 2 | diGly [K49; K63]         |
| CPXVHumGri | A37R | 2  | 2 | 2 | diGly [K37; K42]         |
| CPXVHumGri | A50L | 3  | 2 | 2 | diGly [K75; K83]         |
| CPXVHumGri | A52R | 8  | 2 | 2 | diGly [K143; K148]       |
| CPXVHumGri | A55R | 2  | 1 | 2 | diGly [K102; K104]       |
| CPXVHumGri | A59R | 19 | 8 | 2 | diGly [K18; K134]        |
| CPXVHumGri | A6R  | 5  | 3 | 2 | diGly [K43; K70]         |
| CPXVHumGri | B13R | 3  | 2 | 2 | diGly [K73; K96]         |
| CPXVHumGri | B15L | 2  | 2 | 2 | diGly [K126; K282]       |
| CPXVHumGri | B17R | 3  | 2 | 2 | diGly [K92; K202]        |
| CPXVHumGri | B20R | 4  | 3 | 2 | diGly [K118; K274]       |
| CPXVHumGri | B3R  | 4  | 2 | 2 | diGly [K261; K266]       |
| CPXVHumGri | E8L  | 9  | 4 | 2 | diGly [K22; K211]        |
| CPXVHumGri | E9R  | 4  | 2 | 2 | diGly [K93; K128]        |
| CPXVHumGri | F10R | 6  | 2 | 2 | diGly [K84; K91]         |
| CPXVHumGri | F11L | 5  | 3 | 2 | diGly [K56; K122]        |
| CPXVHumGri | F1L  | 2  | 2 | 2 | diGly [K166; K451]       |
| CPXVHumGri | F3L  | 7  | 3 | 2 | diGly [K45; K108]        |
| CPXVHumGri | G11L | 5  | 2 | 2 | diGly [K18; K315]        |
| CPXVHumGri | H2L  | 5  | 2 | 2 | diGly [K89; K111]        |
| CPXVHumGri | H3R  | 2  | 2 | 2 | diGly [K107; K209]       |
| CPXVHumGri | H7R  | 3  | 2 | 2 | diGly [K127; K132]       |
| CPXVHumGri | M5L  | 2  | 2 | 2 | diGly [K175; K254]       |
| CPXVHumGri | M6R  | 5  | 2 | 2 | diGly [K57; K71]         |
| CPXVHumGri | A32R | 4  | 2 | 1 | diGly [K13]              |
| CPXVHumGri | A34R | 5  | 2 | 1 | diGly [K86]              |
| CPXVHumGri | A38R | 1  | 1 | 1 | diGly [K31]              |
| CPXVHumGri | A41R | 1  | 1 | 1 | diGly [K165]             |
| CPXVHumGri | A42R | 1  | 1 | 1 | diGly [K48]              |
| CPXVHumGri | A54R | 3  | 2 | 1 | diGly [K40]              |
| CPXVHumGri | A58R | 4  | 2 | 1 | diGly [K66]              |
| CPXVHumGri | A5L  | 8  | 4 | 1 | diGly [K27]              |
| CPXVHumGri | B14R | 1  | 1 | 1 | diGly [K203]             |
| CPXVHumGri | B16R | 2  | 2 | 1 | diGly [K503]             |
| CPXVHumGri | B18R | 1  | 1 | 1 | diGly [K550]             |
| CPXVHumGri | B19R | 2  | 1 | 1 | diGly [K340]             |
| CPXVHumGri | B21R | 2  | 1 | 1 | diGly [K100]             |
| CPXVHumGri | B6R  | 6  | 3 | 1 | diGly [K179]             |
| CPXVHumGri | C11L | 1  | 1 | 1 | diGly [K603]             |



|            |      |     |    |    |                                                                                                                                      |
|------------|------|-----|----|----|--------------------------------------------------------------------------------------------------------------------------------------|
| CPXVHumGri | C14L | 3   | 1  | 1  | diGly [K49]                                                                                                                          |
| CPXVHumGri | C16L | 1   | 1  | 1  | diGly [K271]                                                                                                                         |
| CPXVHumGri | C18L | 2   | 1  | 1  | diGly [K486]                                                                                                                         |
| CPXVHumGri | C6L  | 1   | 1  | 1  | diGly [K331]                                                                                                                         |
| CPXVHumGri | E4R  | 1   | 1  | 1  | diGly [K86]                                                                                                                          |
| CPXVHumGri | F5R  | 4   | 1  | 1  | diGly [K263]                                                                                                                         |
| CPXVHumGri | G12L | 3   | 2  | 1  | diGly [K365]                                                                                                                         |
| CPXVHumGri | G15L | 2   | 1  | 1  | diGly [K31]                                                                                                                          |
| CPXVHumGri | G16L | 2   | 1  | 1  | diGly [K92]                                                                                                                          |
| CPXVHumGri | G1L  | 3   | 2  | 1  | diGly [K100]                                                                                                                         |
| CPXVHumGri | G3L  | 4   | 3  | 1  | diGly [K320]                                                                                                                         |
| CPXVHumGri | G5L  | 1   | 1  | 1  | diGly [K314]                                                                                                                         |
| CPXVHumGri | K1R  | 6   | 2  | 1  | diGly [K475]                                                                                                                         |
| CPXVHumGri | L3L  | 2   | 1  | 1  | diGly [K182]                                                                                                                         |
| CPXVHumGri | M3L  | 2   | 1  | 1  | diGly [K82]                                                                                                                          |
| CPXVHumGri | N2R  | 2   | 1  | 1  | diGly [K13]                                                                                                                          |
| CPXVHumGri | Q2L  | 4   | 3  | 1  | diGly [K126]                                                                                                                         |
| CPXVHumGri | R2L  | 1   | 1  | 1  | diGly [K49]                                                                                                                          |
| CPXVRatHei | A11L | 165 | 54 | 21 | diGly [K149; K162; K163; K188; K193; K366; K369; K382; K384; K436; K447; K460; K462; K509; K558; K664; K737; K789; K795; K848; K877] |
| CPXVRatHei | A7L  | 46  | 19 | 14 | diGly [K16; K86; K91; K97; K99; K136; K137; K189; K194; K297; K299; K321; K331; K353]                                                |
| CPXVRatHei | A25R | 37  | 21 | 12 | diGly [K16; K60; K109; K116; K123; K139; K165; K179; K452; K455; K652; K800]                                                         |
| CPXVRatHei | L1L  | 33  | 16 | 12 | diGly [K19; K59; K64; K93; K99; K100; K109; K117; K174; K203; K232; K272]                                                            |
| CPXVRatHei | F2L  | 23  | 13 | 12 | diGly [K64; K79; K81; K103; K229; K238; K435; K443; K480; K510; K523; K552]                                                          |
| CPXVRatHei | F6R  | 46  | 21 | 12 | diGly [K90; K94; K112; K287; K317; K372; K456; K460; K490; K552; K555; K556]                                                         |
| CPXVRatHei | E13L | 26  | 12 | 11 | diGly [K172; K225; K231; K281; K354; K364; K377; K419; K436; K469; K545]                                                             |
| CPXVRatHei | N4R  | 47  | 14 | 10 | diGly [K127; K153; K170; K175; K202; K204; K207; K212; K240; K250]                                                                   |
| CPXVRatHei | A8L  | 28  | 13 | 9  | diGly [K54; K186; K205; K362; K381; K513; K602; K641; K647]                                                                          |
| CPXVRatHei | A4L  | 85  | 29 | 8  | diGly [K111; K153; K185; K189; K270; K311; K471; K564]                                                                               |
| CPXVRatHei | J4L  | 12  | 10 | 8  | diGly [K16; K242; K245; K300;                                                                                                        |

|            |      |    |    |   |                                                      |
|------------|------|----|----|---|------------------------------------------------------|
|            |      |    |    |   | K316; K516; K577; K643]                              |
| CPXVRatHei | J1L  | 37 | 11 | 8 | diGly [K22; K40; K51; K53; K98; K159; K165; K170]    |
| CPXVRatHei | R1L  | 16 | 9  | 8 | diGly [K24; K86; K231; K317; K363; K366; K444; K524] |
| CPXVRatHei | H8L  | 27 | 11 | 8 | diGly [K36; K99; K210; K224; K246; K268; K292; K350] |
| CPXVRatHei | H1L  | 24 | 13 | 8 | diGly [K7; K96; K109; K369; K370; K478; K483; K585]  |
| CPXVRatHei | A44R | 42 | 9  | 7 | diGly [K13; K16; K26; K29; K42; K59; K109]           |
| CPXVRatHei | A26L | 18 | 8  | 7 | diGly [K15; K52; K77; K238; K245; K254; K313]        |
| CPXVRatHei | E11L | 19 | 13 | 7 | diGly [K32; K122; K266; K275; K280; K334; K522]      |
| CPXVRatHei | G10L | 13 | 9  | 7 | diGly [K55; K79; K139; K329; K330; K355; K412]       |
| CPXVRatHei | A53R | 12 | 8  | 7 | diGly [K60; K95; K256; K262; K342; K377; K394]       |
| CPXVRatHei | M4L  | 21 | 9  | 7 | diGly [K86; K89; K298; K300; K327; K380; K392]       |
| CPXVRatHei | C9L  | 9  | 6  | 6 | diGly [K112; K293; K387; K458; K466; K619]           |
| CPXVRatHei | M1L  | 10 | 6  | 6 | diGly [K21; K247; K253; K259; K262; K269]            |
| CPXVRatHei | A27L | 21 | 7  | 6 | diGly [K36; K37; K61; K93; K106; K108]               |
| CPXVRatHei | O4R  | 18 | 12 | 6 | diGly [K37; K663; K972; K974; K1271; K1278]          |
| CPXVRatHei | J3L  | 31 | 15 | 6 | diGly [K38; K46; K108; K147; K224; K253]             |
| CPXVRatHei | H4L  | 16 | 6  | 6 | diGly [K54; K81; K96; K99; K108; K113]               |
| CPXVRatHei | S1R  | 16 | 5  | 6 | diGly [K82; K83; K87; K114; K115; K146]              |
| CPXVRatHei | A17L | 13 | 7  | 5 | diGly [K11; K116; K133; K258; K278]                  |
| CPXVRatHei | E5R  | 15 | 9  | 5 | diGly [K124; K390; K435; K647; K649]                 |
| CPXVRatHei | F8R  | 12 | 7  | 5 | diGly [K13; K165; K180; K187; K267]                  |
| CPXVRatHei | A24R | 10 | 6  | 5 | diGly [K139; K154; K283; K330; K357]                 |
| CPXVRatHei | E6R  | 7  | 5  | 5 | diGly [K198; K213; K392; K573; K575]                 |
| CPXVRatHei | B2R  | 11 | 6  | 5 | diGly [K32; K240; K363; K370; K425]                  |
| CPXVRatHei | C3L  | 13 | 9  | 5 | diGly [K60; K293; K294; K495; K672]                  |
| CPXVRatHei | F9L  | 5  | 5  | 5 | diGly [K642; K734; K818; K844; K959]                 |

|            |      |    |    |   |                                     |
|------------|------|----|----|---|-------------------------------------|
| CPXVRatHei | G13L | 13 | 8  | 5 | diGly [K68; K168; K226; K231; K281] |
| CPXVRatHei | E1R  | 13 | 10 | 4 | diGly [K107; K332; K591; K635]      |
| CPXVRatHei | G17R | 30 | 7  | 4 | diGly [K17; K25; K50; K74]          |
| CPXVRatHei | Q1L  | 16 | 4  | 4 | diGly [K25; K26; K70; K78]          |
| CPXVRatHei | E2L  | 8  | 5  | 4 | diGly [K31; K38; K58; K138]         |
| CPXVRatHei | A23R | 6  | 4  | 4 | diGly [K44; K55; K149; K167]        |
| CPXVRatHei | G4L  | 7  | 4  | 4 | diGly [K7; K50; K269; K295]         |
| CPXVRatHei | B1R  | 10 | 4  | 4 | diGly [K71; K160; K162; K189]       |
| CPXVRatHei | H9R  | 12 | 6  | 4 | diGly [K73; K75; K180; K215]        |
| CPXVRatHei | A12R | 8  | 4  | 3 | diGly [K120; K175; K190]            |
| CPXVRatHei | J5R  | 7  | 4  | 3 | diGly [K16; K140; K194]             |
| CPXVRatHei | F7R  | 10 | 3  | 3 | diGly [K16; K63; K78]               |
| CPXVRatHei | N3L  | 17 | 9  | 3 | diGly [K18; K114; K272]             |
| CPXVRatHei | A5L  | 17 | 7  | 3 | diGly [K18; K27; K33]               |
| CPXVRatHei | H10R | 5  | 3  | 3 | diGly [K202; K236; K308]            |
| CPXVRatHei | E8L  | 15 | 9  | 3 | diGly [K22; K41; K108]              |
| CPXVRatHei | A28L | 14 | 8  | 3 | diGly [K37; K48; K99]               |
| CPXVRatHei | A51R | 3  | 3  | 3 | diGly [K37; K70; K181]              |
| CPXVRatHei | F3L  | 7  | 3  | 3 | diGly [K45; K108; K109]             |
| CPXVRatHei | A33L | 6  | 3  | 3 | diGly [K46; K273; K283]             |
| CPXVRatHei | A29L | 8  | 2  | 3 | diGly [K47; K70; K72]               |
| CPXVRatHei | A14L | 14 | 6  | 3 | diGly [K49; K56; K67]               |
| CPXVRatHei | F4L  | 5  | 4  | 3 | diGly [K61; K81; K92]               |
| CPXVRatHei | A50L | 3  | 3  | 3 | diGly [K75; K83; K227]              |
| CPXVRatHei | A19R | 7  | 5  | 3 | diGly [K81; K88; K297]              |
| CPXVRatHei | C7R  | 7  | 3  | 3 | diGly [K84; K160; K236]             |
| CPXVRatHei | H3R  | 4  | 3  | 3 | diGly [K85; K107; K177]             |
| CPXVRatHei | D12L | 5  | 2  | 3 | diGly [K94; K106; K107]             |
| CPXVRatHei | L7L  | 13 | 6  | 3 | diGly [K97; K129; K160]             |
| CPXVRatHei | A55R | 2  | 1  | 2 | diGly [K102; K104]                  |
| CPXVRatHei | A35R | 6  | 3  | 2 | diGly [K119; K125]                  |
| CPXVRatHei | B15L | 2  | 2  | 2 | diGly [K122; K282]                  |
| CPXVRatHei | C15L | 4  | 2  | 2 | diGly [K13; K58]                    |
| CPXVRatHei | Q2L  | 5  | 3  | 2 | diGly [K134; K135]                  |
| CPXVRatHei | A52R | 6  | 2  | 2 | diGly [K143; K148]                  |
| CPXVRatHei | A3L  | 3  | 2  | 2 | diGly [K15; K45]                    |
| CPXVRatHei | F11L | 4  | 3  | 2 | diGly [K16; K122]                   |
| CPXVRatHei | A2L  | 2  | 2  | 2 | diGly [K170; K175]                  |
| CPXVRatHei | A30L | 5  | 3  | 2 | diGly [K176; K299]                  |
| CPXVRatHei | A59R | 18 | 8  | 2 | diGly [K18; K134]                   |
| CPXVRatHei | D1L  | 4  | 3  | 2 | diGly [K181; K220]                  |
| CPXVRatHei | E3R  | 4  | 3  | 2 | diGly [K184; K192]                  |
| CPXVRatHei | D3L  | 7  | 5  | 2 | diGly [K208; K542]                  |
| CPXVRatHei | N1R  | 4  | 2  | 2 | diGly [K21; K217]                   |

|            |      |    |    |   |                    |
|------------|------|----|----|---|--------------------|
| CPXVRatHei | O1R  | 22 | 12 | 2 | diGly [K226; K234] |
| CPXVRatHei | B3R  | 3  | 2  | 2 | diGly [K261; K266] |
| CPXVRatHei | F1L  | 4  | 3  | 2 | diGly [K304; K451] |
| CPXVRatHei | L8R  | 13 | 8  | 2 | diGly [K32; K152]  |
| CPXVRatHei | C19L | 2  | 2  | 2 | diGly [K33; K114]  |
| CPXVRatHei | A1L  | 3  | 2  | 2 | diGly [K36; K91]   |
| CPXVRatHei | B4R  | 3  | 1  | 2 | diGly [K41; K43]   |
| CPXVRatHei | L4L  | 8  | 3  | 2 | diGly [K414; K655] |
| CPXVRatHei | G3L  | 5  | 4  | 2 | diGly [K42; K320]  |
| CPXVRatHei | A6R  | 6  | 3  | 2 | diGly [K43; K70]   |
| CPXVRatHei | A47L | 5  | 1  | 2 | diGly [K45; K47]   |
| CPXVRatHei | M6R  | 2  | 2  | 2 | diGly [K45; K59]   |
| CPXVRatHei | B16R | 4  | 3  | 2 | diGly [K503; K506] |
| CPXVRatHei | C8L  | 2  | 2  | 2 | diGly [K66; K76]   |
| CPXVRatHei | O2R  | 4  | 2  | 2 | diGly [K7; K160]   |
| CPXVRatHei | H2L  | 4  | 2  | 2 | diGly [K89; K111]  |
| CPXVRatHei | H5R  | 4  | 3  | 2 | diGly [K99; K282]  |
| CPXVRatHei | J7R  | 1  | 1  | 1 | diGly [K102]       |
| CPXVRatHei | A10L | 4  | 2  | 1 | diGly [K112]       |
| CPXVRatHei | D6L  | 1  | 1  | 1 | diGly [K113]       |
| CPXVRatHei | H7R  | 2  | 1  | 1 | diGly [K132]       |
| CPXVRatHei | K2R  | 1  | 1  | 1 | diGly [K152]       |
| CPXVRatHei | A13L | 3  | 2  | 1 | diGly [K167]       |
| CPXVRatHei | G11L | 1  | 1  | 1 | diGly [K18]        |
| CPXVRatHei | L3L  | 1  | 1  | 1 | diGly [K182]       |
| CPXVRatHei | M5L  | 2  | 2  | 1 | diGly [K188]       |
| CPXVRatHei | E12L | 2  | 2  | 1 | diGly [K218]       |
| CPXVRatHei | F5R  | 1  | 1  | 1 | diGly [K263]       |
| CPXVRatHei | B14R | 1  | 1  | 1 | diGly [K280]       |
| CPXVRatHei | A22R | 1  | 1  | 1 | diGly [K306]       |
| CPXVRatHei | A38R | 1  | 1  | 1 | diGly [K31]        |
| CPXVRatHei | G15L | 1  | 1  | 1 | diGly [K31]        |
| CPXVRatHei | C6L  | 2  | 1  | 1 | diGly [K331]       |
| CPXVRatHei | B19R | 2  | 1  | 1 | diGly [K340]       |
| CPXVRatHei | B18R | 1  | 1  | 1 | diGly [K472]       |
| CPXVRatHei | K1R  | 2  | 1  | 1 | diGly [K476]       |
| CPXVRatHei | C14L | 3  | 1  | 1 | diGly [K49]        |
| CPXVRatHei | A57R | 1  | 1  | 1 | diGly [K547]       |
| CPXVRatHei | D4L  | 5  | 2  | 1 | diGly [K564]       |
| CPXVRatHei | O3L  | 1  | 1  | 1 | diGly [K58]        |
| CPXVRatHei | A36R | 4  | 1  | 1 | diGly [K64]        |
| CPXVRatHei | C17L | 3  | 2  | 1 | diGly [K64]        |
| CPXVRatHei | D14L | 1  | 1  | 1 | diGly [K645]       |
| CPXVRatHei | J2R  | 1  | 1  | 1 | diGly [K66]        |
| CPXVRatHei | M3L  | 1  | 1  | 1 | diGly [K82]        |

|            |      |     |    |    |                                                                                                              |
|------------|------|-----|----|----|--------------------------------------------------------------------------------------------------------------|
| CPXVRatHei | A34R | 2   | 2  | 1  | diGly [K86]                                                                                                  |
| CPXVRatHei | G16L | 1   | 1  | 1  | diGly [K92]                                                                                                  |
| CPXVRatKre | A11L | 125 | 50 | 17 | diGly [K149; K188; K193; K366; K436; K447; K462; K509; K558; K572; K664; K737; K757; K789; K795; K848; K856] |
| CPXVRatKre | A7L  | 40  | 18 | 16 | diGly [K16; K86; K91; K97; K99; K105; K136; K137; K189; K194; K201; K297; K299; K317; K321; K331]            |
| CPXVRatKre | C9L  | 26  | 12 | 13 | diGly [K64; K112; K287; K318; K381; K421; K422; K452; K460; K576; K613; K631; K637]                          |
| CPXVRatKre | L1L  | 41  | 17 | 12 | diGly [K19; K59; K99; K100; K109; K117; K174; K178; K193; K203; K232; K254]                                  |
| CPXVRatKre | A4L  | 100 | 32 | 11 | diGly [K82; K83; K111; K153; K164; K185; K189; K270; K311; K407; K471]                                       |
| CPXVRatKre | J3L  | 40  | 15 | 10 | diGly [K38; K46; K77; K108; K116; K147; K161; K224; K253; K266]                                              |
| CPXVRatKre | N4R  | 32  | 12 | 9  | diGly [K127; K170; K175; K202; K204; K207; K212; K240; K250]                                                 |
| CPXVRatKre | E13L | 21  | 11 | 8  | diGly [K172; K231; K354; K364; K377; K419; K436; K469]                                                       |
| CPXVRatKre | F6R  | 34  | 19 | 8  | diGly [K90; K94; K112; K317; K372; K456; K490; K556]                                                         |
| CPXVRatKre | J1L  | 34  | 12 | 8  | diGly [K8; K22; K40; K51; K98; K159; K165; K170]                                                             |
| CPXVRatKre | A44R | 41  | 9  | 7  | diGly [K13; K16; K26; K29; K42; K59; K109]                                                                   |
| CPXVRatKre | B1R  | 8   | 5  | 7  | diGly [K70; K71; K160; K162; K189; K204; K238]                                                               |
| CPXVRatKre | E8L  | 28  | 15 | 7  | diGly [K14; K22; K41; K108; K109; K211; K224]                                                                |
| CPXVRatKre | G13L | 25  | 10 | 7  | diGly [K68; K75; K168; K226; K231; K281; K368]                                                               |
| CPXVRatKre | H8L  | 27  | 11 | 7  | diGly [K36; K38; K99; K224; K246; K268; K292]                                                                |
| CPXVRatKre | A24R | 14  | 7  | 6  | diGly [K139; K153; K154; K283; K330; K357]                                                                   |
| CPXVRatKre | A47L | 19  | 6  | 6  | diGly [K45; K47; K149; K160; K296; K340]                                                                     |
| CPXVRatKre | B19R | 9   | 5  | 6  | diGly [K7; K42; K50; K76; K80; K340]                                                                         |
| CPXVRatKre | B22R | 9   | 7  | 6  | diGly [K58; K1297; K1558; K1669; K1733; K1894]                                                               |
| CPXVRatKre | H1L  | 19  | 10 | 6  | diGly [K7; K96; K109; K369; K370; K478]                                                                      |
| CPXVRatKre | H4L  | 14  | 7  | 6  | diGly [K54; K81; K96; K99; K108; K113]                                                                       |

|            |      |    |   |   |                                      |
|------------|------|----|---|---|--------------------------------------|
| CPXVRatKre | A26L | 9  | 5 | 5 | diGly [K15; K77; K238; K245; K254]   |
| CPXVRatKre | B2R  | 14 | 8 | 5 | diGly [K142; K240; K363; K370; K425] |
| CPXVRatKre | C15L | 9  | 5 | 5 | diGly [K10; K12; K26; K59; K75]      |
| CPXVRatKre | C19L | 11 | 5 | 5 | diGly [K33; K114; K143; K144; K158]  |
| CPXVRatKre | C3L  | 18 | 9 | 5 | diGly [K52; K60; K285; K286; K487]   |
| CPXVRatKre | E5R  | 11 | 6 | 5 | diGly [K124; K390; K647; K649; K745] |
| CPXVRatKre | G17R | 28 | 9 | 5 | diGly [K17; K25; K47; K50; K74]      |
| CPXVRatKre | I5R  | 14 | 7 | 5 | diGly [K138; K185; K186; K217; K225] |
| CPXVRatKre | M1L  | 6  | 4 | 5 | diGly [K21; K253; K262; K269; K271]  |
| CPXVRatKre | A53R | 4  | 4 | 4 | diGly [K182; K241; K260; K392]       |
| CPXVRatKre | E12L | 8  | 4 | 4 | diGly [K83; K88; K95; K218]          |
| CPXVRatKre | F2L  | 8  | 7 | 4 | diGly [K64; K229; K443; K523]        |
| CPXVRatKre | H9R  | 7  | 5 | 4 | diGly [K73; K75; K180; K215]         |
| CPXVRatKre | O2R  | 5  | 3 | 4 | diGly [K7; K134; K135; K160]         |
| CPXVRatKre | Q1L  | 21 | 4 | 4 | diGly [K25; K26; K70; K78]           |
| CPXVRatKre | S1R  | 8  | 3 | 4 | diGly [K82; K87; K114; K115]         |
| CPXVRatKre | A14L | 14 | 6 | 3 | diGly [K49; K56; K67]                |
| CPXVRatKre | A17L | 7  | 3 | 3 | diGly [K116; K133; K258]             |
| CPXVRatKre | A23R | 5  | 3 | 3 | diGly [K44; K149; K167]              |
| CPXVRatKre | A32R | 11 | 3 | 3 | diGly [K13; K25; K27]                |
| CPXVRatKre | A35R | 6  | 3 | 3 | diGly [K111; K119; K125]             |
| CPXVRatKre | A3L  | 7  | 4 | 3 | diGly [K15; K48; K65]                |
| CPXVRatKre | A5L  | 16 | 8 | 3 | diGly [K27; K33; K275]               |
| CPXVRatKre | A8L  | 17 | 9 | 3 | diGly [K186; K205; K513]             |
| CPXVRatKre | C8L  | 6  | 4 | 3 | diGly [K66; K76; K93]                |
| CPXVRatKre | D12L | 7  | 2 | 3 | diGly [K94; K106; K107]              |
| CPXVRatKre | E2L  | 6  | 5 | 3 | diGly [K38; K138; K146]              |
| CPXVRatKre | F3L  | 7  | 3 | 3 | diGly [K45; K108; K109]              |
| CPXVRatKre | F4L  | 9  | 5 | 3 | diGly [K61; K68; K92]                |
| CPXVRatKre | F9L  | 3  | 3 | 3 | diGly [K21; K642; K818]              |
| CPXVRatKre | G10L | 7  | 5 | 3 | diGly [K59; K239; K330]              |
| CPXVRatKre | G4L  | 5  | 3 | 3 | diGly [K7; K50; K295]                |
| CPXVRatKre | H10R | 5  | 3 | 3 | diGly [K202; K230; K236]             |
| CPXVRatKre | H5R  | 7  | 4 | 3 | diGly [K213; K282; K353]             |
| CPXVRatKre | P2L  | 5  | 4 | 3 | diGly [K41; K123; K130]              |
| CPXVRatKre | A13L | 6  | 3 | 2 | diGly [K28; K166]                    |
| CPXVRatKre | A19R | 5  | 3 | 2 | diGly [K88; K297]                    |
| CPXVRatKre | A22R | 2  | 2 | 2 | diGly [K18; K349]                    |
| CPXVRatKre | A25R | 16 | 9 | 2 | diGly [K139; K455]                   |
| CPXVRatKre | A28L | 11 | 5 | 2 | diGly [K37; K48]                     |
| CPXVRatKre | A30L | 7  | 4 | 2 | diGly [K71; K174]                    |

|            |      |    |    |   |                    |
|------------|------|----|----|---|--------------------|
| CPXVRatKre | A33L | 3  | 2  | 2 | diGly [K46; K273]  |
| CPXVRatKre | A36R | 6  | 2  | 2 | diGly [K50; K64]   |
| CPXVRatKre | A42R | 3  | 2  | 2 | diGly [K48; K85]   |
| CPXVRatKre | A50L | 2  | 2  | 2 | diGly [K66; K83]   |
| CPXVRatKre | A55R | 3  | 1  | 2 | diGly [K102; K104] |
| CPXVRatKre | A6R  | 7  | 3  | 2 | diGly [K43; K70]   |
| CPXVRatKre | B21R | 8  | 3  | 2 | diGly [K98; K164]  |
| CPXVRatKre | C1L  | 3  | 2  | 2 | diGly [K363; K398] |
| CPXVRatKre | C6L  | 2  | 2  | 2 | diGly [K7; K331]   |
| CPXVRatKre | D11L | 4  | 2  | 2 | diGly [K181; K196] |
| CPXVRatKre | E1R  | 9  | 6  | 2 | diGly [K107; K332] |
| CPXVRatKre | F7R  | 4  | 2  | 2 | diGly [K16; K78]   |
| CPXVRatKre | F8R  | 5  | 3  | 2 | diGly [K13; K187]  |
| CPXVRatKre | G16L | 4  | 2  | 2 | diGly [K92; K207]  |
| CPXVRatKre | G3L  | 9  | 5  | 2 | diGly [K320; K480] |
| CPXVRatKre | H2L  | 2  | 2  | 2 | diGly [K89; K111]  |
| CPXVRatKre | H3R  | 4  | 2  | 2 | diGly [K107; K170] |
| CPXVRatKre | J4L  | 6  | 4  | 2 | diGly [K577; K643] |
| CPXVRatKre | K1R  | 8  | 3  | 2 | diGly [K216; K476] |
| CPXVRatKre | L4L  | 5  | 2  | 2 | diGly [K414; K691] |
| CPXVRatKre | N1R  | 3  | 2  | 2 | diGly [K21; K113]  |
| CPXVRatKre | O1R  | 17 | 12 | 2 | diGly [K226; K234] |
| CPXVRatKre | O4R  | 8  | 5  | 2 | diGly [K37; K603]  |
| CPXVRatKre | A12R | 4  | 3  | 1 | diGly [K171]       |
| CPXVRatKre | A1L  | 2  | 1  | 1 | diGly [K36]        |
| CPXVRatKre | A2L  | 2  | 2  | 1 | diGly [K175]       |
| CPXVRatKre | A34R | 3  | 2  | 1 | diGly [K86]        |
| CPXVRatKre | A38R | 1  | 1  | 1 | diGly [K31]        |
| CPXVRatKre | A52R | 4  | 1  | 1 | diGly [K143]       |
| CPXVRatKre | A57R | 1  | 1  | 1 | diGly [K430]       |
| CPXVRatKre | B4R  | 4  | 2  | 1 | diGly [K41]        |
| CPXVRatKre | C14L | 2  | 1  | 1 | diGly [K49]        |
| CPXVRatKre | C16L | 2  | 1  | 1 | diGly [K270]       |
| CPXVRatKre | C17L | 3  | 2  | 1 | diGly [K58]        |
| CPXVRatKre | C18L | 2  | 2  | 1 | diGly [K486]       |
| CPXVRatKre | D6L  | 3  | 1  | 1 | diGly [K10]        |
| CPXVRatKre | E11L | 13 | 6  | 1 | diGly [K597]       |
| CPXVRatKre | E3R  | 1  | 1  | 1 | diGly [K192]       |
| CPXVRatKre | E6R  | 2  | 2  | 1 | diGly [K573]       |
| CPXVRatKre | E9R  | 1  | 1  | 1 | diGly [K128]       |
| CPXVRatKre | F1L  | 3  | 2  | 1 | diGly [K451]       |
| CPXVRatKre | F5R  | 1  | 1  | 1 | diGly [K263]       |
| CPXVRatKre | G11L | 3  | 1  | 1 | diGly [K315]       |
| CPXVRatKre | G12L | 4  | 2  | 1 | diGly [K121]       |
| CPXVRatKre | G15L | 2  | 1  | 1 | diGly [K31]        |

|            |     |    |   |   |              |
|------------|-----|----|---|---|--------------|
| CPXVRatKre | G1L | 2  | 2 | 1 | diGly [K81]  |
| CPXVRatKre | I3R | 1  | 1 | 1 | diGly [K543] |
| CPXVRatKre | J2R | 2  | 1 | 1 | diGly [K66]  |
| CPXVRatKre | L7L | 6  | 3 | 1 | diGly [K97]  |
| CPXVRatKre | L8R | 8  | 4 | 1 | diGly [K32]  |
| CPXVRatKre | M2L | 5  | 3 | 1 | diGly [K270] |
| CPXVRatKre | M4L | 5  | 4 | 1 | diGly [K380] |
| CPXVRatKre | N3L | 14 | 7 | 1 | diGly [K277] |
| CPXVRatKre | O3L | 1  | 1 | 1 | diGly [K92]  |
| CPXVRatKre | Q2L | 5  | 3 | 1 | diGly [K126] |



**Table S5: The conserved CPXV IMV ubiquitinome.**

| Gene name (CPXV GRI-90) | Gene name (CPXV BR) | Gene name (VACV WR) | DiGly(K) positions in protein (CPXV BR)          |
|-------------------------|---------------------|---------------------|--------------------------------------------------|
| A11L                    | CPXV142             | VACWR129            | 149; 189; 194; 367; 437; 511; 560; 739; 791; 797 |
| A14L                    | CPXV145             | VACWR132            | 49; 56                                           |
| A17L                    | CPXV149             | VACWR136            | 258                                              |
| A19R                    | CPXV151             | VACWR138            | 88                                               |
| A1L                     | CPXV132             | VACWR119            | 36                                               |
| A23R                    | CPXV155             | VACWR142            | 44                                               |
| A24R                    | CPXV156             | VACWR143            | 154; 283; 330; 357                               |
| A25R                    | rpo132 gene         | VACWR144            | 139                                              |
| A26L                    | ati gene            | VACWR148            | 15; 77; 239; 246; 255                            |
| A28L                    | CPXV162             | VACWR150            | 37                                               |
| A30L                    | CPXV164             | VACWR152            | 174                                              |
| A35R                    | CPXV169             | VACWR157            | 125                                              |
| A36R                    | CPXV171             | VACWR158            | 64                                               |
| A44R                    | CPXV179             | VACWR167            | 13; 16; 26; 29; 42; 59                           |
| A4L                     | CPXV135             | VACWR122            | 111; 185; 189; 270; 311; 471                     |
| A50L                    | CPXV185             | VACWR173            | 83                                               |
| A52R                    | CPXV187             | VACWR175            | 143                                              |
| A53R                    | CPXV188             | VACWR176            | 394                                              |
| A6R                     | CPXV137             | VACWR124            | 70                                               |
| A7L                     | CPXV138             | VACWR125            | 86; 136; 137; 194; 297; 299; 331                 |
| A8L                     | CPX139              | VACWR126            | 513                                              |
| B2R                     | CPXV197             | VACWR184            | 370                                              |
| B4R                     | CPXV199             | VACWR187            | 41                                               |
| C17L                    | CPXV034             | VACWR025            | 62                                               |
| C3L                     | CPXV019             | VACWR199            | 273; 274                                         |
| C8L                     | CPXV024             | VACWR013            | 66; 76                                           |
| D12L                    | CPXV014             | VACWR002            | 96; 108; 109                                     |
| E13L                    | CPXV131             | VACWR118            | 172; 231; 354; 419; 436; 469                     |
| E5R                     | CPXV122             | VACWR110            | 124; 647                                         |
| F3L                     | CPXV069             | VACWR059            | 45                                               |
| F4L                     | CPXV070             | VACWR060            | 62                                               |
| F6R                     | CPXV072             | VACWR062            | 90; 94                                           |
| F8R                     | CPXV074             | VACWR064            | 13; 187                                          |
| G13L                    | CPXV061             | VACWR052            | 168; 226; 231                                    |
| G17R                    | CPXV066             | VACWR056            | 17; 25; 74                                       |
| H10R                    | CPXV098             | VACWR087            | 236                                              |
| H1L                     | CPXV088             | VACWR078            | 7; 96; 109; 369; 370; 478                        |
| H2L                     | CPX089              | VACWR079            | 89; 111                                          |
| H3R                     | CPXV090             | VACWR080            | 107                                              |
| H4L                     | CPXV091             | VACWR081            | 54; 96; 99                                       |
| H5R                     | CPXV092             | VACWR082            | 282                                              |

|     |         |          |                              |
|-----|---------|----------|------------------------------|
| H8L | CPXV095 | VACWR085 | 36; 224; 246; 268; 292       |
| J1L | CPXV110 | VACWR099 | 22; 40; 51; 159; 165; 170    |
| J3L | CPXV112 | VACWR101 | 47; 109; 148; 225; 254       |
| L1L | CPXV080 | VACWR070 | 59; 100; 109; 174; 203; 232  |
| L7L | CPXV086 | VACWR076 | 97                           |
| M1L | CPXV041 | VACWR032 | 21; 262                      |
| N1R | CPXV099 | VACWR088 | 21                           |
| N3L | CPXV101 | VACWR090 | 272                          |
| N4R | CPXV102 | VACWR091 | 175; 202; 207; 212; 240; 250 |
| O1R | CPXV106 | VACWR095 | 234                          |
| O4R | CPXV109 | VACWR098 | 37                           |
| Q1L | CPXV037 | VACWR028 | 70; 78                       |
| S1R | CPXV104 | VACWR093 | 82; 78                       |

**Table S6. Ubiquitinated CPXV mature virion proteins without conserved sites.**

| Gene CPXV <sup>a</sup> | Gene VACV <sup>b</sup> | Protein description                                             |
|------------------------|------------------------|-----------------------------------------------------------------|
| A34R                   | 156                    | EEV glycoprotein                                                |
| A47L                   | 170                    | 3 $\beta$ -Hydroxysteroid dehydrogenase/ $\Delta$ 5-4 isomerase |
| C9L                    | 014 (truncated)        | Ankyrin repeat domain-containing protein                        |
| E2L                    | 107                    | Core protein D2                                                 |
| E8L                    | 113                    | Cell surface-binding protein                                    |
| G11L                   | 050                    | RhoA signaling inhibitor                                        |
| G4L                    | 043                    | Ribonucleoside-diphosphate reductase small chain                |
| H9R                    | 086                    | Late transcription factor 1                                     |
| J4L                    | 102                    | RNA polymerase-associated protein                               |
| M4L                    | 035                    | Phospholipase-D-like protein K4                                 |
| O2R                    | 096                    | DNA-directed RNA polymerase 22 kDa subunit                      |

<sup>a</sup> Gene name according to CPXV GRI-90    <sup>b</sup> Gene name according to VACV WR

**Table S7: CPXV proteins regulated by the proteasome.**

| Gene (CPXV GRI-90) | Degradation by proteasome | Description                                                                 |
|--------------------|---------------------------|-----------------------------------------------------------------------------|
| A22R               | +                         | DNA polymerase processivity factor component A20                            |
| A24R               | +                         | Intermediate transcription factor 3 large subunit                           |
| A25R               | +                         | DNA-directed RNA polymerase 133 kDa polypeptide                             |
| A36R               | +                         | Protein A35 Inhibitor of MHC class II antigen presentation                  |
| A38R               | +                         | Putative uncharacterized protein                                            |
| A49R               | +                         | Toll/IL1-receptor [TIR]-like protein                                        |
| A51R               | +                         | Thymidylate kinase                                                          |
| A52R               | +                         | Putative uncharacterized protein                                            |
| A53R               | +                         | DNA ligase                                                                  |
| A54R               | +                         | Putative uncharacterized protein                                            |
| B11R               | +                         | Probable serine/threonine-protein kinase B12                                |
| B12R               | +                         | Serine proteinase inhibitor 2/CrmA                                          |
| B19R               | +                         | Kelch repeat and BTB domain-containing protein 2                            |
| B1R                | +                         | Serine/threonine-protein kinase 1                                           |
| B20R               | +                         | Serine proteinase inhibitor 1                                               |
| B22R               | +                         | Putative uncharacterized protein                                            |
| B2R                | +                         | Putative uncharacterized protein                                            |
| B9R                | +                         | Kelch repeat protein B10                                                    |
| C16L               | +                         | Putative uncharacterized protein                                            |
| C18L               | +                         | Kelch repeat protein C2                                                     |
| C1L                | +                         | Putative uncharacterized protein                                            |
| C3L                | +                         | Putative uncharacterized protein                                            |
| C6L                | +                         | Protein C10                                                                 |
| C7R                | +                         | E3 ubiquitin-protein ligase p28-like                                        |
| D10L               | +                         | Putative uncharacterized protein                                            |
| D11L               | +                         | Kelch repeat/ BTB domain protein                                            |
| D14L               | +                         | Putative uncharacterized protein                                            |
| D6L                | +                         | Protein N2                                                                  |
| E12L               | +                         | mRNA-capping enzyme regulatory subunit                                      |
| E1R                | +                         | mRNA-capping enzyme catalytic subunit                                       |
| E5R                | +                         | Primase D5                                                                  |
| F1L                | +                         | Poly(A) polymerase catalytic subunit                                        |
| F4L                | +                         | DNA-directed RNA polymerase 30 kDa polypeptide                              |
| F9L                | +                         | DNA polymerase                                                              |
| G11L               | +                         | Protein F11                                                                 |
| G12L               | +                         | Protein F12                                                                 |
| G15L               | +                         | Protein F15                                                                 |
| G1L                | +                         | Mitochondria-associated apoptosis inhibitor, caspase-9 inhibitor, BCL2-like |
| G3L                | +                         | Kelch repeat protein F3                                                     |
| G4L                | +                         | Ribonucleoside-diphosphate reductase small chain                            |
| H5R                | +                         | Putative nuclease G5                                                        |

|      |   |                                                        |
|------|---|--------------------------------------------------------|
| I2R  | + | Ankyrin repeat protein C9L                             |
| K1R  | + | Putative uncharacterized protein                       |
| L3L  | + | SsDNA-binding phosphoprotein                           |
| L4L  | + | Ribonucleoside-diphosphate reductase large subunit     |
| M1L  | + | Interferon antagonist K1L                              |
| M2L  | + | Serine protease inhibitor-like protein SPI-3           |
| M5L  | + | Putative monoglyceride lipase f2                       |
| O1R  | + | Cap-specific mRNA (nucleoside-2'-O-)-methyltransferase |
| O2R  | + | DNA-directed RNA polymerase 22 kDa subunit             |
| O4R  | + | DNA-directed RNA polymerase 147 kDa polypeptide        |
| P1L  | + | Ankyrin repeat protein M1                              |
| P2L  | + | Protein M2                                             |
| R1L  | + | Protein O1                                             |
| A11L | - | Major core protein 4a precursor                        |
| A39R | - | Putative uncharacterized protein                       |
| A46R | - | Putative uncharacterized protein                       |
| A4L  | - | Major core protein 4b                                  |
| G11L | - | Protein F11                                            |
| G5L  | - | 36 kDa major membrane protein F5                       |
| H4L  | - | Glutaredoxin-2, VACV G4                                |
| J5R  | - | VLTF-4 viral late transcription factor                 |

**Table S8: Host proteins degraded by the proteasome.**

| UniProt accession | Protein name                                                |
|-------------------|-------------------------------------------------------------|
| E7ENZ3            | T-complex protein 1 subunit epsilon                         |
| 1433E             | Isoform SV of 14-3-3 protein epsilon                        |
| 4F2               | Isoform 2 of 4F2 cell-surface antigen heavy chain           |
| A0A087WXQ8        | Proteasome subunit beta type-3                              |
| ACOD              | Acyl-CoA desaturase                                         |
| AFF4              | Isoform 2 of AF4/FMR2 family member 4                       |
| ASCC3             | Activating signal cointegrator 1 complex subunit 3          |
| ASPM              | Abnormal spindle-like microcephaly-associated protein       |
| AT2B4             | Isoform ZK of Plasma membrane calcium-transporting ATPase 4 |
| B1ALC0            | Actin-related protein 2/3 complex subunit 5                 |
| B3KM87            | Matrin-3                                                    |
| B4DK69            | Aldo-keto reductase family 1 member C2                      |
| B4DLR8            | NAD(P)H dehydrogenase [quinone] 1                           |
| C9J425            | Fatty acid desaturase 1                                     |
| C9JKI3            | Caveolin                                                    |
| CCD50             | Coiled-coil domain-containing protein 50                    |

|         |                                                                      |
|---------|----------------------------------------------------------------------|
| CTGE2   | cTAGE family member 2                                                |
| DAG1    | Dystroglycan                                                         |
| DEGS1   | Sphingolipid delta(4)-desaturase DES1                                |
| DUS1    | Dual specificity protein phosphatase 1                               |
| E5RFT1  | Zinc transporter ZIP14                                               |
| E5RI99  | 60S ribosomal protein L30                                            |
| E5RIU6  | Cyclin-dependent kinase 1                                            |
| E7EN77  | Condensin complex subunit 1                                          |
| E7ESE0  | 60S ribosomal protein L9                                             |
| E9PF10  | Nuclear pore complex protein Nup155                                  |
| E9PL01  | Signal peptidase complex subunit 2                                   |
| E9PR16  | Nuclear pore complex protein Nup160                                  |
| ENOA    | Alpha-enolase                                                        |
| F5GYT8  | Methylcrotonoyl-CoA carboxylase subunit alpha, mitochondrial         |
| F5GZ90  | Denticleless protein homolog                                         |
| F5H2X1  | Ubiquitin carboxyl-terminal hydrolase                                |
| F5H6X6  | Neutral alpha-glucosidase AB                                         |
| F8VPF3  | Myosin light polypeptide 6                                           |
| F8W1G3  | Bax inhibitor 1                                                      |
| F8W7C6  | 60S ribosomal protein L10                                            |
| FADS2   | Isoform 4 of Fatty acid desaturase 2                                 |
| FAS     | Fatty acid synthase                                                  |
| FDFT    | Isoform 4 of Squalene synthase                                       |
| GNAI3   | Guanine nucleotide-binding protein G(k) subunit alpha                |
| GNAS2   | Guanine nucleotide-binding protein G(s) subunit alpha isoforms short |
| H0Y720  | Trinucleotide repeat-containing gene 6B protein                      |
| H0Y804  | Aldo-keto reductase family 1 member C1                               |
| H0Y8T0  | N-alpha-acetyltransferase 11                                         |
| H0Y9P0  | Receptor of-activated protein C kinase 1                             |
| H0YAW4  | Eukaryotic translation initiation factor 3 subunit E                 |
| H0YB22  | 40S ribosomal protein S14                                            |
| H0YBG3  | Myc proto-oncogene protein                                           |
| H12     | Histone H1.2                                                         |
| H15     | Histone H1.5                                                         |
| H2AY    | Core histone macro-H2A.2                                             |
| H3BP78  | Fanconi anemia group I protein                                       |
| H3BQN4  | Fructose-bisphosphate aldolase                                       |
| H7B XK9 | ATP-binding cassette sub-family B member 6, mitochondrial            |
| HSPB1   | Heat shock protein beta-1                                            |
| I3L192  | Basigin                                                              |
| IER2    | Immediate early response gene 2 protein                              |
| IF2G    | Eukaryotic translation initiation factor 2 subunit 3                 |
| IF4A1   | Eukaryotic initiation factor 4A-I                                    |
| IL32    | Isoform 4 of Interleukin-32                                          |
| J3QR09  | Ribosomal protein L19                                                |

|        |                                                                |
|--------|----------------------------------------------------------------|
| K2C7   | Keratin, type II cytoskeletal 7                                |
| K7ENJ0 | UV excision repair protein RAD23 homolog A                     |
| K7ER16 | Phenylalanine--tRNA ligase alpha subunit                       |
| KPYM   | Isoform M1 of Pyruvate kinase PKM                              |
| LDHB   | L-lactate dehydrogenase B chain                                |
| M0R210 | 40S ribosomal protein S16                                      |
| MOT1   | Monocarboxylate transporter 1                                  |
| MRP1   | Isoform 8 of Multidrug resistance-associated protein 1         |
| NDUA4  | Cytochrome c oxidase subunit NDUFA4                            |
| NONO   | Isoform 2 of Non-POU domain-containing octamer-binding protein |
| NSF1C  | Isoform 4 of NSFL1 cofactor p47                                |
| PLD1   | Isoform PLD1C of Phospholipase D1                              |
| PRKDC  | Isoform 2 of DNA-dependent protein kinase catalytic subunit    |
| PRP8   | Pre-mRNA-processing-splicing factor 8                          |
| PSB2   | Proteasome subunit beta type-2                                 |
| PSB4   | Proteasome subunit beta type-4                                 |
| PSDE   | 26S proteasome non-ATPase regulatory subunit 14                |
| PSMD7  | 26S proteasome non-ATPase regulatory subunit 7                 |
| Q5T8U2 | 60S ribosomal protein L7a                                      |
| RL11   | Isoform 2 of 60S ribosomal protein L11                         |
| RL15   | 60S ribosomal protein L15                                      |
| RL3    | 60S ribosomal protein L3                                       |
| RNH2A  | Ribonuclease H2 subunit A                                      |
| RS10   | 40S ribosomal protein S10                                      |
| RS23   | 40S ribosomal protein S23                                      |
| RS27A  | Ubiquitin-40S ribosomal protein S27a                           |
| S10A4  | Protein S100-A4                                                |
| S19A1  | Isoform 2 of Folate transporter 1                              |
| S29A1  | Equilibrative nucleoside transporter 1                         |
| S43A3  | Solute carrier family 43 member 3                              |
| SND1   | Staphylococcal nuclease domain-containing protein 1            |
| SUMO2  | Isoform 2 of Small ubiquitin-related modifier 2                |
| SYTC   | Threonine--tRNA ligase, cytoplasmic                            |
| TCP4   | Activated RNA polymerase II transcriptional coactivator p15    |
| TCPZ   | Isoform 2 of T-complex protein 1 subunit zeta                  |
| TERA   | Transitional endoplasmic reticulum ATPase                      |
| TKT    | Transketolase                                                  |
| TRI25  | E3 ubiquitin/ISG15 ligase TRIM25                               |
| VIME   | Vimentin                                                       |
